# 1 MemBright: a Family of Fluorescent Membrane Probes for Advanced Cellular 2 Imaging and Neuroscience

3  
4 Mayeul Collot,<sup>\*a</sup> Pichandi Ashokkumar,<sup>a</sup> Halina Anton,<sup>a</sup> Emmanuel Boutant,<sup>a</sup> Orestis  
5 Faklaris,<sup>b</sup> Thierry Galli,<sup>bc</sup> Yves Mély,<sup>a</sup> Lydia Danglot,<sup>\*bc</sup> Andrey S. Klymchenko<sup>\*a</sup>

6  
7 a. Laboratoire de Biophotonique et Pathologies, UMR 7021 CNRS, Université de Strasbourg,  
8 Faculté de Pharmacie, 74, Route du Rhin, 67401 ILLKIRCH Cedex, France.

9 b. University Paris Diderot, Sorbonne Paris Cité, Institut Jacques Monod, CNRS UMR 7592,  
10 75013 Paris, France

11 c. INSERM U894, Institute of Psychiatry and Neuroscience of Paris, Membrane Traffic in  
12 Healthy and Diseased Brain, 102 rue de la Santé, 75 014 PARIS.

13 *\*Corresponding authors:* [mayeul.collot@unistra.fr](mailto:mayeul.collot@unistra.fr); [lydia.danglot@inserm.fr](mailto:lydia.danglot@inserm.fr);  
14 [andrey.klymchenko@unistra.fr](mailto:andrey.klymchenko@unistra.fr)

15  
16 **Abstract.** The proper staining of the plasma membrane (PM) is critical in bioimaging as it  
17 delimits the cell. Herein, we developed MemBright: a family of six cyanine-based fluorescent  
18 turn-on PM probes that emit from orange to near-infrared when reaching the PM, and  
19 enable homogeneous and selective PM staining with excellent contrast in mono and two-  
20 photon microscopy. These probes are compatible with long-term live cell imaging and  
21 immunostaining. Moreover, MemBright label neurons in a brighter manner than  
22 surrounding cells allowing identification of neurons in acute brain tissue section and  
23 neuromuscular-junctions without any use of transfection or transgenic animals. At last,  
24 MemBright were used in super-resolution imaging to unravel the dendritic spines' neck. 3D  
25 multicolor dSTORM in combination with immunostaining revealed en-passant synapse  
26 displaying endogenous glutamate receptors clustered at the axonal-dendritic contact site.  
27 MemBright probes thus constitute a universal toolkit for cell biology and neuroscience  
28 biomembrane imaging with a variety of microscopy techniques.

## 29 30 31 Introduction

32 Plasma membrane (PM), in addition to its basic function of cell barrier, is a key player in  
33 crucial biological processes including cellular uptake, neural communication, muscle  
34 contraction, and cell trafficking and signalling.<sup>1</sup> In the field of bioimaging, visualizing the PM  
35 is of prior importance as it delimits the cell surface. In addition, the shape of the PM directly  
36 provides information regarding the cell status such as cell division or cell death processes.<sup>2</sup>

1 Visualizing plasma membrane is particularly important in neuroscience, because it enables  
2 visualization neuronal organization and membrane trafficking involved in the synaptic  
3 transmission.<sup>3</sup> Recent years have seen a tremendous expansion of fluorescence imaging  
4 techniques and tools for cellular research. In addition to genetically encoded fluorescent  
5 proteins, a number of molecular probes for monitoring cellular events have been  
6 developed.<sup>4,5</sup> The key challenge in cellular imaging is to stain cell compartments with high  
7 specificity and persistence. Although numerous efficient molecular probes have been  
8 designed to selectively stain specific cellular structures including mitochondria,<sup>6</sup> lipid  
9 droplets,<sup>7</sup> endoplasmic reticulum,<sup>8</sup> nucleus<sup>9</sup> and lysosomes,<sup>10-11</sup> there is still a demand for  
10 efficient and bright fluorescent PM markers.<sup>12</sup> Fluorescently labelled lectins notably wheat  
11 germ agglutinin (WGA) and concanavalin A<sup>9</sup> are popular fluorescent membrane probes.  
12 Despite their efficiency and ease of use, these probes are expensive and much larger than  
13 molecular probes. The small size of the latter, comparable to lipids, allows their precise  
14 location in the lipid bilayer, which is of key importance for studies of the lateral lipid  
15 organization of biomembranes (lipid rafts),<sup>12, 13</sup> FRET with membrane proteins<sup>14</sup> and super-  
16 resolution imaging.<sup>15-16</sup> Therefore, molecular probes are an interesting alternative to  
17 protein-based membrane markers. Although highly hydrophobic fluorophores are efficient  
18 markers of membrane models such as liposomes, they generally fail in staining the cell PM of  
19 live cells as they tend to precipitate before reaching the membrane and to quickly cross the  
20 PM to stain inner membranes.<sup>12, 17</sup> Recent efforts have been made to develop specific and  
21 efficient PM probes for cell imaging with various fluorophores including chromone,<sup>18-19</sup> Nile  
22 Red,<sup>20</sup> styryl pyridinium,<sup>21</sup> BODIPY,<sup>22-23</sup> perylene,<sup>24</sup> oligothiophene,<sup>25-26</sup> conjugated  
23 polymers,<sup>27</sup> or FITC-labelled chitosan.<sup>28-29</sup> From the rapid development of multicolor imaging  
24 arose a demand for red-shifted fluorescent markers. Red-shifted fluorophores, especially  
25 near-infrared ones are highly popular for bio-imaging applications due to their long  
26 wavelength (650-900 nm) excitation and emission that reduce photodamage of biological  
27 samples, allow deep tissue penetration and avoid background signal from cell auto-  
28 fluorescence.<sup>30-31</sup> We recently proposed an efficient far-red emitting PM fluorescent marker  
29 called dSQ12S based on a squaraine dye with two zwitterionic amphiphilic anchors,  
30 exhibiting superior staining compared to commonly used hydrophobic cyanines, such as DiD,  
31 PKH family, etc.<sup>32</sup> Application of this unique design concept to cyanine family, highly popular  
32 in bioimaging applications,<sup>33</sup> could open numerous opportunities. First, cyanines are among  
33 the brightest dyes that can be obtained in any desired emission color spanning from the  
34 visible (orange) to the near-infrared. Second, due to their capacity to form non-fluorescent

1 *H*-aggregates, they can be transformed into fluorogenic probes.<sup>34</sup> Third, cyanine dyes have  
2 been established as robust tool for superresolution microscopy (SRM),<sup>35</sup> which could enable  
3 us to propose new membrane probes particularly adapted to SRM. Herein, we thus designed  
4 new membrane probes based on zwitterionic anchors and various cyanine fluorophores  
5 (Cy3/Cy3.5/Cy5/Cy5.5/Cy7/Cy7.5) using click chemistry. These probes provide very selective  
6 and bright plasma membrane staining and surpass all tested commercial dyes. They  
7 constitute a versatile tool as they allow both live, fixed, and permeabilized cells/tissue  
8 imaging using mono- or two-photon imaging. As a proof of concept we unravelled for the  
9 first time the nanoscale organisation of the axonal en-passant synapse coiling around the  
10 dendrite using 3D multicolor SRM.

11

12

## 13 **Results**

14

### 15 **Synthesis of MemBright and spectroscopic studies**

16

17 Spectroscopic properties of cyanines depend on the length of their polymethine chain, the  
18 longer chain, the higher wavelength it emits. A finer color tuning can be achieved by  
19 replacing the indole moieties by benz[e]indole ones. Herein, to obtain probes of different  
20 color, we first synthesized six di-alkyne cyanines: 3, 3.5, 5, 5.5, 7 and 7.5 (Fig. 1A). The latter  
21 were reacted with a Clickable Amphiphilic Zwitterion (CAZ) via CuAAC to provide the  
22 MemBright probes family (Fig. 1A).

23 Spectroscopic studies of MemBright were performed in various organic solvents and buffer,  
24 as well as in the presence of Large Unilamellar Vesicles (LUVs) constituted of 1,2-Dioleoyl-sn-  
25 glycerol-3-phosphocholine (DOPC) with and without cholesterol, taken as membrane models.

26 In organic solvents, MemBright probes behaved in the same manner as their parent cyanine  
27 fluorophores. Indeed, their absorption spectra were narrow and close to the mirror image of  
28 their emission spectra, indicating no sign of aggregation (Fig. S1 to S6). Moreover, they  
29 displayed good quantum yields (0.12 - 0.66 in DMSO).

30 Due to their amphiphilic nature, MemBright markers are expected to form soluble  
31 aggregates in aqueous media. Indeed, DLS measurements in water showed formation of  
32 nanoparticles of 22 to 32 nm (Fig. S7). Moreover, their absorption spectra in phosphate  
33 buffer displayed a strong short-wavelength shoulder suggesting formation of non-  
34 fluorescent *H*-type aggregates, known for their blue shifted absorption<sup>36</sup> (Fig. 1B). As

1 expected, MB-Cy3 to MB-Cy5 probes displayed much lower quantum yields in buffer than in  
2 organic solvents, while MB-Cy5.5, MB-Cy7 and MB-Cy7.5 were nearly non-fluorescent in  
3 water (Table S1). In order to model the PM, we used large unilamellar vesicles (LUVs)  
4 composed of either DOPC or DOPC/cholesterol mixture (1/0.9 mol. ratio). In the presence of  
5 these LUVs, MemBright probes displayed typical absorption and fluorescence spectra of  
6 solubilized cyanine dyes (Fig. 1B and C) with quantum yield generally higher than those  
7 obtained in methanol (Table S1). The fluorescence enhancement between the aqueous  
8 media and the DOPC vesicles was 7-, 42- and 18-fold for MB-Cy3, MB-Cy3.5 and MB-Cy5,  
9 respectively, whereas for MB-Cy5.5 to MB-Cy7.5 it was much larger due to their strong  
10 quenching in aqueous media. Thus, MemBright being aggregated in water disassemble in  
11 lipid membranes (Fig. 1D), providing fluorogenic response. This mechanism is in line with the  
12 earlier data obtained with membrane probes based on Nile red<sup>20</sup> and squaraine.<sup>32</sup>  
13 In order to determine how fast the aggregates of MemBright disassemble in the presence of  
14 LUVs, probes were added to an excess of LUVs and their fluorescence emission intensity was  
15 followed over the time (Fig. S8). Whereas MB-Cy3 and MB-Cy5 rapidly reached their  
16 fluorescence intensity plateau in the presence of DOPC vesicles (<3 min), the other probes  
17 disassembled in a slower manner. Overall, the disassembly time increased with the  
18 polymethine chain length (Cy3 < Cy5 < Cy7) and addition of fused benzene rings (Cy3 < Cy3.5  
19 and Cy5 < Cy5.5). We expect that more hydrophobic MemBright probes tend to form more  
20 stable aggregates, which require more time to disassemble in the presence of membranes.

21

## 22 **Cellular imaging**

23

24 The ability of MemBright probes to selectively stain the PM was first investigated on live  
25 HeLa and KB cells. HeLa cells were chosen as they are widely used human cell lines. KB  
26 human cells (derived from HeLa cells) were chosen for their simple shape and appropriate  
27 height that facilitates PM imaging. A solution of MemBright probes (20 nM) in a serum-free  
28 medium was added to the cells and the latter were directly imaged without washing. WGA-  
29 488, a green emitting membrane marker based on a fluorescently labelled lectin (wheat  
30 germ agglutinin), was used to localize the PM. After 5 minutes, the PM displayed a clean and  
31 bright fluorescent staining with a clear co-localization of MemBright probes with WGA-488  
32 (Fig. 2A for KB cells, Fig. S9 for HeLa cells) and high signal to background ratio (up to 18, see  
33 Table S2). Vertical projections of the confocal images confirmed perfect membrane staining  
34 by MemBright probes with no apparent internalization (Fig. 2B and S10-S11). The quality of



1 the staining also allowed for 3D imaging of live KB cells using reconstruction of Z-stack  
2 obtained by laser scanning confocal microscopy (Fig. 2C and movies 1). These images offered  
3 high contrast and clearly revealed intercellular nanotubes, also called tunnelling nanotubes<sup>37</sup>  
4 as bright thin PM structures connecting two individual cells (Fig. 2C).

5 According to our recent report, in similar imaging conditions, the commercial dye DiD at 20  
6 nM concentration failed to stain cellular membranes.<sup>32</sup> Indeed, due to its highly hydrophobic  
7 nature, DiD is poorly soluble in aqueous media, which renders PM staining very inefficient.  
8 Another commercial probe, CellVue® Claret from PKH family, is also very hydrophobic and  
9 thus, requires a specific low-salt medium for PM staining. Moreover, its cell membrane  
10 staining is heterogeneous.<sup>32</sup> Therefore, commercial cyanines, such as DiD (and its analogues  
11 DiI and DiO) and PKH family as well as CellMask™ membrane stains<sup>9</sup> require concentration  
12 around 1-5  $\mu$ M for robust PM staining. Thus, MemBright probes require  $\sim$ 1000 fold lower  
13 concentration compared to commercial membrane probes. Surprisingly, although MB-Cy7  
14 also possesses a near-infrared excitation wavelength ( $\sim$ 760 nm), it was sufficiently excited by  
15 the 635 nm laser (corresponding to 10% of its peak absorbance) and was bright enough to  
16 provide good quality 2D and 3D images.

17 In addition, compared to fluorescently labelled lectin WGA-488, MemBright probes  
18 displayed a more homogeneous staining of the PM when cells are confluent (Fig. S12). In the  
19 focal plane, most of the confluent cells' PM is involved in cell-cell contacts. Within these  
20 junctions, carbohydrates located on the outer leaflet of the PM are much less accessible for  
21 the lectin than those exposed to the external medium. It was measured that in cell junctions,  
22 MemBright probes stain the PM > 3-fold more efficiently than WGA-488 (Fig. S12). This  
23 feature is due to rapid diffusion of MemBright within the whole PM, which ensures a  
24 homogeneous staining.

25 Next, the fluorescent staining of the PM was checked 90 minutes after addition of  
26 MemBright probes. For MB-Cy3 and MB-Cy5, the results showed that although the staining  
27 predominantly remains on the PM, internalisation partially occurred as some dots appeared  
28 in the cytoplasm, revealing the endocytosis process. In contrast, the red-shifted versions of  
29 MB-Cy3 and MB-Cy5, namely MB-Cy3.5 and MB-Cy5.5, conserved a very selective PM  
30 staining with less apparent sign of internalisation (Fig. S13). We expect that the additional  
31 fused benzene rings, which significantly increase the lipophilicity of these probes, should  
32 either favour their escape from the endocytosis process or stimulate their recycling back to  
33 the PM after endocytosis. Consequently, MB-Cy3 and MB-Cy5 will be preferred for short-  
34 term PM imaging, whereas MB-Cy3.5 and MB-Cy5.5 will be better for longer-term imaging.

1 At this stage of our work, it was important to evaluate the cytotoxicity of the MemBright  
2 probes. The MTT assays were performed with different MemBright probes on KB cells and  
3 the results showed no apparent cytotoxicity of the probes at concentrations up to 1  $\mu$ M (Fig.  
4 S14).

5 Formaldehyde-based cell fixation is indispensable tool in cellular imaging. However, it leads  
6 to partial permeabilization of the PM, so that application of molecular PM probes in fixed  
7 cells is challenging. To check the possible application of the MemBright probes for imaging  
8 the PM of fixed cells, we first tried to add the dyes on fixed cells (4% PFA). Although specific  
9 staining was obtained (Fig. S15), it was noticed that prolonged time of imaging led to  
10 diffusion of the dyes within the fixed cells. However, when images obtained with WGA-488  
11 and MemBright on fixed cells were compared, one could notice that WGA tended to stain  
12 the perinuclear envelope as well as the inner vesicles in addition to PM, whereas MemBright  
13 probes stained more selectively the PM (Fig. S16). As an alternative attempt, the dyes were  
14 added to the cells prior to fixation. This approach provided much cleaner and longer staining  
15 of the PM with only slight amount of internalized dye, demonstrating the compatibility of  
16 these probes with fixed cells (Fig. S17).

17

## 18 **Two-photon excitation microscopy**

19

20 Two-photon excitation (TPE) microscopy imaging has received considerable attention as an  
21 advanced optical technique in the field of bio-imaging for several reasons.<sup>38, 39</sup> First, TPE  
22 microscopy inherently provides three-dimensional sectioning since the excitation occurs  
23 only at the focal point of the sample. In addition, due to its localized excitation with a NIR  
24 laser, it reduces the photobleaching, the phototoxicity, and the cell auto-fluorescence. It also  
25 ensures deeper tissue penetration, which enables experiments on thicker live samples. For  
26 these reasons, there is a high demand for bright fluorescent probes with high TPE cross  
27 section values. On-going efforts have been made to design such fluorophores.<sup>40</sup> Although  
28 cyanine fluorophores are widely used for bio-labelling and bio-imaging, only few studies  
29 reported on their efficiency for TPE imaging,<sup>41, 42, 43</sup> giving impression that they are not well  
30 adapted for this microscopy technique. Since MemBright markers are localized in PMs in cell  
31 experiments, their two-photon fluorescence excitation spectra were measured in an aprotic  
32 solvent: DMSO (Fig. 3 A-D, top). The two-photon nature of the absorption process was  
33 verified from the quadratic dependence of the observed emission intensity vs excitation  
34 power (Fig. S18). To our surprise, MemBright probes displayed high two-photon action

1 cross-section in this solvent with values reaching up to 1200 Goeppert-Mayer (GM) for MB-  
2 Cy5. TPE spectra and cross section of MB-Cy3 were found to be similar to those for the  
3 previously reported Cy3 dye.<sup>54</sup> For all the MemBright probes, the maxima of TPE bands were  
4 blue shifted with respect to the one-photon absorption bands at twice the wavelength, as  
5 reported for cyanine dyes.<sup>52</sup> It is remarkable that fused benzene rings significantly increased  
6 TPE cross-section for MB-Cy3.5 and shifted significantly the TPE absorption to the red for  
7 both MB-Cy3.5 and MB-Cy5.5 compared to their parent analogues (Fig. 3 A-D). In order to  
8 confirm the results obtained for the MemBright probes, TPE spectrum of the parent dye, DID  
9 (lipophilic cyanine-5), was measured in DMSO and was found to be almost identical to that  
10 of MB-Cy5 (Fig. S19). In the light of these unexpected results, MemBright probes were used  
11 in two-photon imaging experiments. Live KB cells were stained with MemBright probes  
12 without washing and imaged with two-photon excitation, chosen based on their TPE  
13 excitation spectra. High signal to noise ratio images were obtained for each of the  
14 MemBright probes with a highly selective staining of the PM (Fig. 3 A-D, bottom).

15

## 16 **Tissue imaging**

17

18 Fluorescence tissue imaging with molecular probes is more challenging as the environment  
19 is more complex and presents heterogeneity of components (cells, extracellular matrix,  
20 ducts, vessels) and fluids (e.g. plasma, blood, bile).<sup>44, 45</sup> Here, applicability of MemBright  
21 probes to *ex vivo* tissue imaging was tested. As a first example, liver tissue was chosen. For  
22 this purpose, 1 mm thick blocks of rat liver were incubated for 3 h in the presence of MB-  
23 Cy5. The liver tissues were imaged by two-photon microscopy providing stacks of 50 images  
24 up to 50  $\mu\text{m}$  depth. In the case of MB-Cy5 (Fig. S20) a clear PM staining was obtained and  
25 hepatocytes appeared as polygonal cells (Fig. S21). At 20  $\mu\text{m}$  depth hepatocytes are well  
26 delimited by an intense PM staining and projections on the yz and xz plans (Fig. S20B-C)  
27 showed that the PM can be stained up to 3 layers of cells in the tissue (See movie 2). The  
28 lower intensity at higher depths is clearly related to the limited diffusion of the probe  
29 through the tissue, which in principle could be improved by optimizing the staining  
30 conditions. In sharp contrast, WGA-Alexa647, used in the same conditions, showed unclear  
31 staining that appeared mainly in the nuclei (Fig. S20D-F and movie 3). Thus, MemBright is  
32 clearly advantageous compared to the commercial agent for the PM staining in tissue  
33 imaging. MemBright Cy3.5 was also very efficient in PM labelling either using two-photon  
34 excitation microscopy or conventional confocal microscopy. We tested the photo-resistance

1 of MemBright by performing either mosaic (Fig. 3E and F) or 3D pictures (Fig. 3G and movie  
2 4, 3D reconstruction) in large 1 mm thick liver slices. MB-Cy3.5 was resistant to continuous  
3 illumination and mosaic imaging even when acquiring 3D tile pictures reconstruction (> 100 z  
4 slices), indicating a good resistance to photobleaching. At high magnification the high signal  
5 to noise ratio of MB-Cy3.5 allowed to clearly discriminate the PM of hepatocytes and even  
6 their intracellular lipoprotein vesicles (Fig. 3H).

7

8 Encouraged by these results, we investigated on the ability of MemBright to stain the PM in  
9 brain slices. The study of neuronal arborisation has been investigated for years in various  
10 type of mutant animals using either Dil labelling thanks to biolistic approaches<sup>46</sup> (Dil  
11 impregnated gold beads projected over neurons through genegun) or with the use of  
12 transgenic mice reporter (Thy-1-GFP)<sup>47, 48</sup> expressing cytosolic fluorescent protein in  
13 neuronal cytoplasm. Although those technics are robust and accurate, they provide  
14 heterogeneous staining. Moreover, they are technically difficult to set up and time  
15 consuming. Herein, brain slices were incubated in the presence of MemBright before being  
16 imaged by different fluorescence imaging techniques. Taking advantage of its high two-  
17 photon absorption cross-section and red shifted emission, MB-Cy3.5 succeeded in providing  
18 good quality images of pyramidal neurons in the hippocampus of mouse brain (inset B and C  
19 Fig. 4) by two-photon excitation imaging of brain slices (Fig. 4A). The images clearly revealed  
20 the *stratum pyramidale* region (light blue layer in 5B and 5C), where the soma of the  
21 pyramidal neurons were highly stained as well as their dendrites, as thinner structures,  
22 localized in the *stratum radiatum*. 3D rendering over Z-stack (Fig. 4D) allowed visualization  
23 of the dendrite deep in the tissue as well as dendritic spines (arrows). Thus, MemBright  
24 enable fast visualization of neuronal cell layer packing as well as dendrites density.

25 Moreover, these results suggest that MemBright probes are able to label neuronal cells at  
26 higher intensity than other cell types. We then checked if this characteristic was specific to  
27 hippocampal pyramidal cells, or whether MemBright could be used in other regions of the  
28 brain. 1 mm cortex (Fig. 4E-F) and cerebellum (Fig. 4G) slices were efficiently labelled and  
29 imaged either on confocal (Fig 4E) or two-photon excitation imaging (Fig 4F). Cortical  
30 neurons and Purkinje cells can be clearly seen in Fig. 4F and 4G respectively. Altogether,  
31 these results indicate that MemBright has propensity to label some major neuronal cell  
32 types.

33 As MemBright displayed a high affinity towards neurons, we wanted to demonstrate  
34 whether it was able to reveal motor neurons in tissue imaging. To this aim, muscle fibers

1 with nerves were extracted from *tibialis anterior* muscles of an adult mouse and were fixed  
2 and incubated with MB-Cy5. Fluorescently labelled  $\alpha$ -Bungarotoxin, which binds to nicotinic  
3 receptors clustered at synapse, was used to label the neuromuscular junctions and served  
4 to visualize the whole muscle fiber. As shown in Fig. S22, the whole axon and the terminal  
5 motor nerve was clearly revealed by MB-Cy5. Both live and fixed samples could be efficiently  
6 labelled without any permeabilization. The staining was resistant enough to confocal stack  
7 imaging. 3D reconstruction allowed visualizing the nerve terminal in close apposition with  
8 the motor plate (Fig. S22B-C-D).

9

## 10 **Neuronal & glial cell imaging**

11

12 The ability of MemBright to label polarised cells organized in networks (neurons) or in  
13 confluent layers (pavement of astrocytes) was investigated. In this endeavour, we used  
14 hippocampal neuronal cells which can be seed and fed on astrocytes feeder layer.<sup>49</sup> Primary  
15 hippocampal cultures are efficiently labelled with any member of the MemBright family (Fig.  
16 5, for MB-Cy5.5 see Fig. S23), revealing neuronal cells lying over astrocytes. This experiment  
17 confirmed what was previously noticed in tissue imaging, that neurons appeared in a much  
18 brighter manner than glial cells, suggesting a preferential staining of neurons by MemBright.  
19 Although MemBright probes were used at very low concentration (typically, 20 nM directly  
20 in the imaging medium), they allow revealing even very fine protrusion including astrocytic  
21 filopodia (Fig. 5A3, A4, E, E1) or fine dendritic processes (Fig. 5A, B, C and D). Unlike the use  
22 of fluorescent proteins, this method leads to the labelling of all cells in live microscopy  
23 without any transfection steps that are poorly efficient and can be deleterious in neuronal  
24 cells.

25

26 Live cells could be labelled and imaged on confocal or spinning disc microscopy in  
27 combination with other vital staining (Fig. S23-S24). Very interestingly, labelled live cells  
28 could be kept with the dye during several days without any visible detrimental effects.  
29 Indeed, neuronal culture composed of hippocampal primary neurons and glial cells was  
30 labelled with MemBright and imaged over several hours under confocal illumination. As  
31 seen in supplementary movie 5, the brightness of MemBright and its low toxicity allowed to  
32 monitor the cells with only 0.2% power of 561 nm laser line over 13 h without any loss of  
33 membrane staining. Fine neuronal filopodia and widespread glial lamellipodia could be  
34 easily tracked thanks to MemBright imaging. MemBright is thus able to provide an efficient

1 membrane labelling over long periods even at 37°C. We then compared MemBright labelling  
2 on live neurons with other classical membrane probes. As expected from HeLa and KB cells  
3 labelling, the WGA staining on neurons was very bright and homogenous from cell to cell  
4 (Fig. S25A). However when inspecting carefully the PM, we noticed dashed staining along  
5 the PM, impeding fast segmentation of cell shape (Fig. S25B). This might be attributed to the  
6 non-homogeneous expression of glycosylated protein at the PM. To circumvent this problem  
7 we reasoned that staining by lipidic dyes should be more homogeneous. Consequently,  
8 MemBright was compared to DID (Fig. 25C-F) over neuronal network. Although DiD labelling,  
9 compared to WGA, was more homogeneous along the PM and allowed perfect visualization  
10 of the cell shape, staining intensity from cell to cell was variable ranging from very faint  
11 (white arrowhead in Fig. S25C-D) to very bright (red arrow head in Fig. S25C-D). MemBright  
12 was then compared to mCLING, a polylysine-based membrane probes developed for super-  
13 resolution imaging.<sup>50</sup> For this purpose, we strictly followed the protocol provided by the  
14 developers of mCLING.<sup>51</sup> As shown in Fig. S26A, after 10 min incubation, mCLING labelling is  
15 mostly punctiform and seemed to be mainly internalized in intracellular vesicles as shown  
16 previously.<sup>50</sup> Conversely, MemBright was still present at the PM and clearly allowed the  
17 identification of neuronal cell bodies (Fig. S26B) as well as axonal or dendritic networks.

18

### 19 **Monitoring membrane trafficking and cellular architecture with endogenous proteins**

20

21 We then explored whether MemBright probes allowed tracking of endocytic vesicles. We  
22 thus performed incubation of MemBright at 37°C with an antibody directed against L1-CAM,  
23 an adhesion protein expressed at the cell surface and known to be recycled by trafficking  
24 vesicles.<sup>52</sup> As shown in Fig. 6A1-A3, MemBright colocalized perfectly with L1-CAM at the cell  
25 surface. Live antibody uptake (Fig. 6A4-A6) showed that endocytic vesicles containing L1-  
26 CAM are also labelled with MemBright, indicating that a portion of MemBright can be  
27 internalised to monitor endocytosis. It is noteworthy that vesicles stained with MemBright  
28 are more numerous than vesicles containing L1-CAM indicating that MemBright can be used  
29 to track various endocytic pathways. Additionally, a high amount of MemBright is still  
30 present at the PM surface, which can help assessing membrane morphology and monitoring  
31 endocytosis in the same channel.

32 Using a PM sensor in conjunction with classical immunochemistry would avoid time-  
33 consuming transfection of GFP reporters that are usually not efficient and very difficult in  
34 primary cells. As discussed previously, fixation followed by permeabilization leads to leakage

1 of the dye out of the PM. Here, after optimizing the permeabilization process we used  
2 MemBright labelling in combination with primary VGLUT antibody to unravel the  
3 glutamatergic synaptic vesicles within axonal presynaptic sites. As shown in Fig. 6B, we  
4 succeeded in maintaining MemBright labelling after fixation, allowing the detection of  
5 VGLUT synapse (arrows in 9B1 and 9B2) contacting dendrite labelled with MemBright.  
6 Confocal section allowed the visualization of either dendritic membrane from a top external  
7 view (in 9B2) and from a crossing section revealing the dendritic lumen (9B1). 3D-view of a  
8 Z-stack led to a clear identification of the neuronal cell body and dendrites (in red) contacted  
9 by several glutamatergic synapses (in green).

10

11 Dendritic spines are known to be very dynamic tiny structure that change shape during  
12 memory,<sup>53</sup> therefore we decided to tackle this detection with MemBright. The identification  
13 of the spine shape is usually done with phalloidine on fixed samples or with transgenic  
14 fluorescent mice or transfection on live neurons. Double labelling with phalloidine and  
15 MemBright on live samples showed that both dendritic spine head and neck can be  
16 efficiently labelled by MemBright with a preserved labelling after fixation (Fig. 6C1-A3).

17

## 18 **Unravelling synapse and dendritic spine morphology using super-resolution imaging**

19

20 Over the last decade, super-resolution fluorescence microscopy has pushed the diffraction  
21 limit in cell imaging.<sup>54</sup> Among the available techniques, Stochastic Optical Reconstruction  
22 Microscopy (STORM)<sup>55</sup> and PhotoActivation Localization Microscopy (PALM)<sup>56-57</sup> are based  
23 on successive activation, imaging and high precision localization of photoswitchable or  
24 blinking fluorophores. Here, MemBright probes were used at 20 nM to stain fixed HeLa cells  
25 which were imaged by Total Internal Reflection Fluorescence (TIRF) Microscopy and high-  
26 resolution dSTORM. Among the developed probes, MB-Cy3.5 was selected as the most  
27 efficient for dSTORM imaging. After an initial bleaching phase, MB-Cy3.5 exhibited a stable  
28 blinking. A series of 6000-10000 frames were acquired and high-resolution images were  
29 reconstructed (Fig. S28). The localization precision depending on the intensity of the  
30 background signal ranged between 17-20 nm (~700 photons detected). dSTORM image of  
31 MB-Cy3.5 labelled PM clearly showed an increase of the resolution compared to the  
32 standard TIRF image (Fig. S27A-B). Indeed, the intensity plot profile of a cell filopodium  
33 evidenced a decrease of the thickness from 430 nm to 120 nm that corresponds to a 3.5-fold  
34 increase of the image resolution (Fig. S27C).



1

2 With this tool in hand, we then assessed if MBCy3.5 could reveal dendritic spine morphology  
3 on fixed samples in 3D STORM microscopy. First, we showed that MemBright efficiently  
4 labelled dendritic spine neck and head, allowing the identification of mushroom spines at  
5 either 9 (Fig. 7A-C, and movie 6) or 14 days *in vitro* (Fig. 7D). 3D imaging with color-coded  
6 depth allowed the visualization over several microns from back (Fig. 7B) to front view (Fig.  
7 7B and 10D). As a comparison, we assessed the ability of our previously developed PM probe  
8 dSQ12S to provide dSTORM imaging in similar conditions. Although dSQ12S successfully  
9 stained the PM of neurons in widefield microscopy, it rapidly photobleached (Fig. S28) and  
10 did not blink sufficiently to provide dSTORM super resolution images (Fig. S29). Then,  
11 MemBright was used as a reference PM probe in multi-color STORM microscopy after  
12 fixation and permeabilization. As shown in Fig. 7E-G, MemBright allowed visualizing both  
13 axonal (Fig. 7E-G-I) and dendritic processes (Fig. 7E-F-H). Since MemBright stains axonal  
14 processes in a much brighter manner than dendrite, it first allowed us to visualize axon  
15 coiling around a dendrite in the first thousands of pictures; then, longer acquisition revealed  
16 the whole dendritic processes. Additional immunostaining of AMPA glutamate receptors  
17 (GluR2 subunit) revealed that glutamate receptors were accumulated at the axon-dendritic  
18 junctions. Altogether, these experiments showed that MemBright can be used as reference  
19 membrane markers in both conventional and STORM microscopy on either live or fixed  
20 samples.

21

## 22 **Discussion**

23

24 In this work, we developed a family of bright PM probes based on cyanines, so-called  
25 MemBright, of six different colors and demonstrated its versatility for imaging the PM by  
26 several imaging techniques. Taking advantage of the symmetric structure of cyanines, they  
27 were modified with two amphiphilic zwitterionic anchors ensuring the selective and  
28 persistent staining of the PM. In aqueous media, these probes form non-fluorescent dark  
29 aggregates, whereas in the presence of lipid membranes, these aggregates dissociate into  
30 highly fluorescent molecular species solubilised in the bilayer. This turn-on capability of  
31 MemBright probes enabled cellular imaging without any washing step with high signal to  
32 noise ratio in both live and fixed cells. A structure-property relationship was established as  
33 the most lipophilic probes (MB-Cy3.5, MB-Cy5.5 and MB-Cy7.5) tend to label the PM in a  
34 slower manner (15 minutes vs 5 minutes) but, in the meantime, provide longer-term staining

1 of the PM. Owing to the high brightness of their cyanine fluorophore and efficient membrane  
2 staining, MemBright probes can be used at concentrations as small as 1 nM, which is >1000-  
3 fold lower than those commonly used for long-chain cyanines, like DID, PKH family or  
4 mCLING. To get sufficient signal other probes are used at higher concentrations but can then  
5 become toxic for cells as shown for mCLING above 2  $\mu$ M.<sup>51</sup> Moreover, in confluent cells,  
6 MemBright probes were found to stain the PM in a more homogeneous manner than the  
7 fluorescently labelled WGA, a protein-based membrane marker, because the former are  
8 small molecules that can diffuse rapidly within the lipid membrane and unlike WGA are not  
9 dependent on the heterogeneous expression of glycan at the cell surface. This property of  
10 MemBright probes can be a real asset for imaging PM in 3D cell cultures, tissues and small  
11 animals, featuring tight packing of the cells. MemBright probes were also found to be  
12 efficient in two-photon excitation imaging, with two-photon cross-section reaching 1800 GM  
13 for Cy5-based probe, and served to image deep PM in liver and brain tissues. In the field of  
14 neuroimaging, MemBright probes were successfully applied for imaging live and fixed  
15 neuronal networks, showing excellent imaging contrast of the PMs of the primary neurons  
16 together with astrocytes. This is a really powerful advantage over transfection method,  
17 which are usually deleterious for the cells and which allow the detection of only 5-10 % of  
18 the neurons within a population. This has prompted the user in the past to use transgenic  
19 reporter mice, such as THY1-fluorescent transgenic lines.<sup>58</sup> However, this method is almost  
20 reserved to the mouse species since transgenic rat, marmoset or other mammal animal  
21 models are still rare. The MemBright are here usable whatever the species and eventually on  
22 human samples coming from surgical resections. Moreover, due to the wide range of  
23 available colors, MemBright can also be used in combination with green or red transgenic  
24 mice using complementary red, deep-red or near infrared MemBright. Other alternatives  
25 used to label neurons in brain tissue are biocytin injection<sup>59</sup> and Dil, DiO and DiD tissue-  
26 labelling pastes or crystals.<sup>60</sup> Whereas the injection needs a fluorescent streptavidin  
27 application to reveal the neurons, the second one rely on insoluble dyes in water which can  
28 be problematic for application.<sup>61</sup> Indeed those products are usually placed via a needle into  
29 the brain area or by using gene gun. This usually results in a non-homogenous dispersion of  
30 the dye leading to a very bright local fluorescence. MemBright are water-dispersible and  
31 thus can be used either incubated on cultured cells or directly on slices, which does not  
32 require any special skills. Moreover they can be visualized directly without any additional  
33 revealing steps thanks to their intrinsic fluorescence. At last MemBright probes combine the  
34 capability of the Neurotrace<sup>TM</sup> dye<sup>9</sup> for neuronal soma and Fluoromyeline<sup>TM</sup> dye<sup>9</sup> for labelling

1 myelin in spinal cord.<sup>62</sup> Indeed, MemBright stains well the cell soma as well as the dendrites  
2 (Fig. 5 and 10), axons (Fig. 7 and 10) and commissural and association fibers (*corpus*  
3 *callosum*, *fimbria* – data not shown). Very interestingly, it appeared that MemBright markers  
4 preferentially stain the PM of neurons with a higher intensity compared to surrounding cells  
5 present in the brain (e.g. glial cells). This tendency allowed imaging neurons in various  
6 regions of the brain tissue with high signal to background ratio. Additionally, MemBright  
7 enables high-contrast imaging of motor neurons *in vivo*, which opens perspectives in the  
8 important field of nerve-specific fluorescence guided surgery.<sup>63</sup>  
9 Finally, we showed that MemBright Cy3.5, owing to its capacity to blink, enables STORM-  
10 type super-resolution microscopy. To our knowledge, MemBright are the first plasma  
11 membrane probes operating at nanomolar concentrations in live or fixed samples using  
12 conventional confocal, two-photon as well as super resolution (STORM) microscopy. Since  
13 MemBright is compatible with cell fixation and permeabilization, it can be used in  
14 combination with immunofluorescence and open a wide avenue to multicolor imaging at the  
15 nanoscopic resolution. Several teams are currently trying to decipher the nanoarchitecture  
16 of molecular complexes with STORM microscopy.<sup>64 65 66 67 68</sup> It is thus crucial to get a plasma  
17 membrane staining to precisely localize these proteins in their plasma membrane  
18 environment in order to map their cellular distribution. Additionally, this is of paramount  
19 importance in the context of 3D reconstruction. Most of actual studies lack of membrane  
20 staining as reference and display dotted lines indicating the putative location of cell limits.  
21 We provide here the first blinking membrane probe which is also resistant enough to  
22 permeabilization and reducing buffer to allow such a use in multi-color STORM  
23 immunostaining. We showed for the first time the nanoscale organization of both axonal  
24 and dendritic compartments in combination with endogenous glutamate receptors clusters  
25 in multi-color 3D STORM. Glutamate receptors are clearly aggregated at contact site  
26 between axon and dendrites as well as at extrasynaptic sites. This membrane reference thus  
27 allows the fine molecular mapping of endogeneous proteins at the nanoscale level within  
28 the cellular context that was, up to now, only possible with EM microscopy. In conclusion,  
29 due to the availability of six different colors within 550-850 nm spectral range, combined to  
30 their ease of use, their brightness and compatibility with different microscopy techniques,  
31 the MemBright family appears as a powerful toolbox for bio-membrane imaging in cell  
32 biology and neuroscience.  
33  
34

## 1 **Material and Methods**

2

### 3 **Abbreviations**

4 PM: Plasma Membrane; WGA-488: Wheat Germ Agglutinin-Alexa-488; FRET: Förster  
5 Resonance Energy Transfer; FITC: Fluorescein IsoThioCyanate; CuAAC: Copper(I)-catalyzed  
6 alkyne-azide cycloaddition; LUV: Large Unilamellar Vesicles; DOPC:  
7 Dioleoylphosphatidylcholine; DMSO: Dimethyl Sulfoxide; PB: Phosphate Buffer; Chol:  
8 Cholesterol; DLS: Dynamic Light Scattering; PFA: Paraformaldehyde; GM: Goeppert-Mayer;  
9 STORM: Stochastic Optical Reconstruction Microscopy; PALM: PhotoActivation Localization  
10 Microscopy; TIRF: Total Internal Reflection Fluorescence; RT: Room Temperature; MEA:  
11 mercaptoethanol amine.

12

### 13 **Synthesis of MemBright**

14 Synthesis, protocols, characterizations and spectra are described in the supporting  
15 information. NMR spectra were recorded on a Bruker Avance III 400 MHz spectrometer.  
16 Mass spectra were obtained using an Agilent Q-TOF 6520 mass spectrometer.

17

### 18 **Lipid Vesicles**

19 Dioleoylphosphatidylcholine (DOPC) and cholesterol were purchased from Sigma-Aldrich.  
20 Large unilamellar vesicles (LUVs) were obtained by the extrusion method as previously  
21 described.<sup>69</sup> Briefly, a suspension of multilamellar vesicles was extruded by using a Lipex  
22 Biomembranes extruder (Vancouver, Canada). The size of the filters was first 0.2  $\mu\text{m}$  (7  
23 passages) and thereafter 0.1  $\mu\text{m}$  (10 passages). This generates monodisperse LUVs with a  
24 mean diameter of 0.11  $\mu\text{m}$  as measured with a Malvern Zetasizer Nano ZSP (Malvern, U.K.).  
25 LUVs were labelled by adding 5  $\mu\text{L}$  of probe stock solution in dimethyl sulfoxide to 1-mL  
26 solutions of vesicles. A 20 mM phosphate buffer, pH 7.4, was used in these experiments.  
27 Molar ratios of probes to lipids were generally 1 to 500-1000.

28

29

30

### 31 **Spectroscopy**

32 Absorption spectra were recorded on a Cary 4000 spectrophotometer (Varian) and  
33 fluorescence spectra on a Fluoromax 4 (Jobin Yvon, Horiba) spectrofluorometer.  
34 Fluorescence emission spectra were systematically recorded at room temperature, unless

1 indicated. All the spectra were corrected from wavelength-dependent response of the  
2 detector. The fluorescence and absorption spectra of the corresponding blank suspension of  
3 lipid vesicles without the probe was subtracted from these spectra. Concentrations of dyes  
4 were 400 nM for MB-Cy3 and MB-Cy3.5, 280 nM for MB-Cy5 and MB-Cy5.5, 220 nM for MB-  
5 Cy7 and 600 nM for MB-Cy7.5. Quantum yields were determined by comparison with a  
6 reference according to their excitation and emission wavelengths: Rhodamine 101 in EtOH<sup>70</sup>  
7 was used as the reference for MB-Cy3, Cresyl Violet in EtOH<sup>70</sup> for MB-Cy3.5, DID in MeOH<sup>71</sup>  
8 for MB-Cy5, Rhodamine 800 in EtOH<sup>72</sup> for MB-Cy5.5 and Indocyanine green in MeOH<sup>73</sup> for  
9 MB-Cy7 and MB-Cy7.5.

10

### 11 **DLS measurements**

12 The sizes of the particles formed by MemBright in water were measured by Dynamic Light  
13 Scattering (DLS) using a Malvern Zetasizer Nano ZSP (Malvern, U.K.). Concentration of the  
14 dye was 5  $\mu$ M. The size of particles formed by MB-Cy5 and MB-Cy5.5 could not be measured  
15 due to the wavelength of the DLS laser (633 nm).

16

### 17 **Cellular studies**

18 HeLa cells (ATCC<sup>®</sup> CCL-2) were grown in Dulbecco's modified Eagle medium (DMEM, Gibco-  
19 Invitrogen), supplemented with 10% fetal bovine serum (FBS, Lonza) and 1% antibiotic  
20 solution (penicillin-streptomycin, Gibco-Invitrogen) at 37° C in humidified atmosphere  
21 containing 5% CO<sub>2</sub>. KB cells (ATCC<sup>®</sup> CCL-17) were grown in minimum essential medium  
22 (MEM, Gibco-Invitrogen) with 10% fetal bovine serum (FBS, Lonza), 1% non-essential amino  
23 acids (Gibco-Invitrogen), 1% MEM vitamin solution (Gibco-Invitrogen), 1% L-Glutamine  
24 (Sigma Aldrich) and 0.1% antibiotic solution (gentamicin, Sigma-Aldrich) at 37° C in  
25 humidified atmosphere containing 5% CO<sub>2</sub>. Cells were seeded onto a chambered coverglass  
26 (IBidi<sup>®</sup>) at a density of  $1 \times 10^5$  cells/well 24h before the microscopy measurement. For a  
27 nuclear staining, the medium was replaced by Hoechst 33342 (ThermoFisher, 5  $\mu$ g/mL) in  
28 Opti-MEM (Gibco-Invitrogen) and the cells were incubated for 10 minutes at 37°C. For  
29 imaging, the medium was removed and the attached cells were washed with HBSS (Gibco-  
30 Invitrogen) three times. Then, a freshly prepared solution of MemBright in HBSS (typically 20  
31 nM) was quickly added to the cells without any washing step. Prior to imaging, PM was co-  
32 stained by addition of wheat germ agglutinin-Alexa488, WGA-AlexaFluor<sup>®</sup>488 (1 mg/mL in  
33 water) at a final concentration of 5  $\mu$ g/mL. Confocal microscopy experiments were  
34 performed by using a Leica TCS SPE-II with HXC PL APO 63x/1.40 OIL CS objective. The

1 microscope settings were: 405 nm laser for excitation of Hoechst 33342, emission was  
2 collected between 420 and 470 nm; 488 nm laser for excitation of WGA-AlexaFluor®488,  
3 emission was collected between 500 and 550 nm. For excitation of MB-Cy3 and MB-Cy3.5,  
4 561 nm laser was used with 567-750 nm detection range. For excitation of MB-Cy5, MB-  
5 Cy5.5 and MB-Cy7, 635 nm laser was used with 640-800 nm detection range. The images  
6 were processed with the ImageJ software. In the case of fixed cells 1) fixation followed by  
7 staining. The HeLa cells seeded onto the 1 mL Ibidi® Chamber were washed once with D-  
8 PBSx1 (Lonza) and fixed in 4% paraformaldehyde (PFA - Electron Microscopy Sciences) at  
9 room temperature during 10 min. The fixed cells were washed three times with D-PBS to  
10 remove the excess of PFA before usual staining and imaging. For an efficient staining on  
11 fixed cells, 2) staining followed by fixation. The cells seeded onto the 1 mL Ibidi® Chamber  
12 were stained with 20 nM of MemBright for 10-15 minutes at room temperature, the excess  
13 of MemBright was washed with HBSS and the cells were fixed with 4% paraformaldehyde in  
14 HBSS for 10 minutes at room temperature before being washed 2 times with HBSS.

15

16

#### 17 **Neuromuscular junction preparation**

18 Dissected hindlimb tibialis anterior (TA) muscles from adult C57BL6 mice were fixed (4% PFA  
19 in PBS) for 20 minutes at room temperature and further incubated overnight at 4°C with  
20 MB-CY5 (200 nM), Hoechst and alpha-bungarotoxin-Alexa594. After three washed in PBS,  
21 mounted under glass in Vectashield (Vector Labs, Burlingame, CA). Incubation of MB-Cy5 for  
22 30 min on non-fixed preparations also gave good results.

23

#### 24 **Cytotoxicity assay**

25 Cytotoxicity assay of the MemBright dyes was quantified by the MTT assay (3-(4,5-  
26 dimethylthiazol-2-yl)-2,5-diphenyltetrazolium bromide). A total of  $1 \times 10^4$  KB cells/well were  
27 seeded in a 96-well plate 24 h prior to the cytotoxicity assay in Dulbecco's Modified Eagle  
28 Medium (Gibco Lifetechnologies -DMEM) complemented with 10% fetal bovine serum,  
29 Penicilin (100 UI/mL), Streptomycin (100 µg/mL), L-Glutamine (2 mM) and were incubated in  
30 a 5% CO<sub>2</sub> incubator at 37°C. After medium removal, an amount of 100 µL DMEM containing  
31 1000 nM, 200 nM or 20 nM of MemBright (MB-Cy3, MB-Cy3.5, MB-Cy5, MB-Cy5.5 and MB-  
32 Cy7) was added on the KB cell and incubated during 1 h at 37°C (5% CO<sub>2</sub>). As control, for  
33 each 96-well plate, the cells were incubated with DMEM containing the same percentage of  
34 DMSO (0,5% v/v) as the solution with the tested dyes or with Triton 1% as a positive control

1 of cytotoxicity. After 1h of dye incubation, the medium was replaced by 100  $\mu$ L of a mix  
2 containing DMEM + MTT solution (diluted in PBS beforehand) and the cells were incubated  
3 during 4 h at 37°C. Then, 75  $\mu$ L of the mix was replaced by 50  $\mu$ L of DMSO (100%) and gently  
4 shaken for 15 min at room temperature in order to dissolve the insoluble purple formazan  
5 reduced in living cells. The absorbance at 540 nm was measured (absorbances of the dyes at  
6 540 nm were taken into account). Each concentration of dye was tested in sextuplicate in 3  
7 independant assays. For each concentration, we calculated the percentage of cell viability in  
8 reference of the control DMEM+ 0,5% DMSO.

9

#### 10 **TPE measurements**

11 Two-photon absorption cross-section measurements were performed using Rhodamine B in  
12 methanol as a calibration standard according to the method of Webb *et al.* Two-photon  
13 excitation was provided by an InSight DS + laser (Spectra Physics) with a pulse duration of  
14 120 fs. The laser was focused with an achromatic lens ( $f = 2$  cm) in a cuvette containing the  
15 dye (0.2–1.0  $\mu$ M in DMSO) and the spectra were recorded with a fibered spectrometer  
16 (Avantes) by collecting the fluorescence emission at 90° with a 20  $\times$  Olympus objective.

17

#### 18 **Two-photon imaging**

19 Two-photon fluorescence microscopy imaging was performed by using a home-built two-  
20 photon laser scanning setup based on an Olympus IX70 inverted microscope with an  
21 Olympus 60x 1.2NA water immersion objective.<sup>74</sup> Two-photon excitation was provided by an  
22 InSight DS + laser (Spectra Physics), and photons were detected with Avalanche Photodiodes  
23 (APD SPCM-AQR-14-FC, Perkin-Elmer) connected to a counter/timer PCI board (PCI6602,  
24 National Instrument). Imaging was carried out using two fast galvo mirrors in the descanned  
25 fluorescence collection mode. Typical acquisition time was 50 s with an excitation power of  
26 5 mW at the laser output. The images were processed with ImageJ.

27

#### 28 **Tissue imaging**

29 Rat tissue: Fresh samples of rat liver tissue were cut (2 $\times$ 5 mm, 1 mm thickness) and kept in  
30 Krebs solution at RT. Before staining, the samples were washed 3 times with Krebs solution  
31 at RT. For the staining, the tissue samples were placed 3 h at RT in 1 mL of freshly prepared  
32 solution of dye (MB-Cy5: 5  $\mu$ M in HBSS, WGA-647: 10  $\mu$ g/mL in HBSS). The tissue samples  
33 were washed 3 times with HBSS before being placed in a iBiDi dish containing 3 mL of HBSS,  
34 and were then flattened by adding a glass slide on the top of it. The samples were excited at



1 810 nm with a power of 5 mW for both MB-Cy5 and WGA-647. 50 frames (60 × 60 nm, 512  
2 × 512 pixels) were collected with a depth step of 1 μm, providing stacks of 50 μm depth.  
3 Each frame was scanned once with a speed of 4 ms per pixel. The images were processed  
4 with ImageJ.

5 Mice tissue: C57BL6/J mice were maintained on a 12 hour light-dark cycle with *ad libitum*  
6 access to food and water. All animal work was conducted following protocol approved by  
7 ethical committee. Adult C57BL6 mice were euthanized by CO<sub>2</sub> administration. Liver and  
8 brain were immediately dissected and washed in PBS at 4°C, before being sliced in 1 mm  
9 slices on a Leica Vibratome. Tissue slices were placed either at RT or at 4°C in 1 mL of freshly  
10 prepared solution of dye (MB-Cy3.5, Cy5 and Cy5.5: 5 μM in PBS) for a variable period (from  
11 1 to 24 h). The tissue samples were washed 3 times with PBS before being placed in a  
12 homemade glass chamber, allowing the imaging on both side of the slides. Briefly a 1 cm  
13 hole was breached in a glass slide thanks to a diamond drill bit. The 1 mm tissue slice was  
14 inserted in the hole, covered by a coverslip (170 nm, #1.5) on each slide, and sealed with  
15 Picodent twinsil. The slices were excited on a LavisisionBiotec two-photon Microscope at 800  
16 nm with a TiSa laser (Insight Spectra Physics (690-1300 nm) for both MB-Cy3.5 and Hoechst.  
17 Each frame was scanned twice (line average 2) with a speed of 0.4 μs per pixel using a 20x  
18 plan Apo Chroma Zeiss (NA:1) water-immersion objective. The fluorescence signal was  
19 detected with GaAsP detectors. Confocal microscopy was performed on a Leica SP5  
20 microscope (405 nm (25 mW); Argon Krypton 488 (40 mW), 561 nm (15 mW); HeNe 633 nm  
21 (10 mW)). Pictures were acquired with ideal sampling with a PL APO 20x/0.75 or 63x/1.4 CS2  
22 objectives. The images were processed with Icy software.

23

## 24 **Neuronal imaging**

25 All experiments on mice were performed in accordance with European Community  
26 guidelines legislation and reviewed by the local ethical committee of the Paris Diderot  
27 University. Hippocampal cultures from 18-day-old Sprague-Dawley rat embryos were  
28 prepared as described previously<sup>49, 75</sup>. Cells were dissociated by treatment with 0.25%  
29 trypsin for 15 min at 37°C and plated on poly-Ornithine (1 mg/mL, Sigma) coated glass  
30 coverslips in MEM supplemented with 10% horse serum, 0,6% glucose, 0,2% sodium  
31 bicarbonate, 2 mM glutamine, and 10 IU/mL penicillin-streptomycin. After attachment  
32 neurons were grown in neurobasal medium supplemented with B27 (ThermoFisher)  
33 conditioned on astroglia. Neurons were then image either on Leica DMI8 spinning disc  
34 microscope for live cells or on SP5 confocal microscope and DMRE microscope for fixed

1 samples. Neurons were incubated 10 min with MemBright at 37°C, washed 3 times in Krebs  
2 Ringer buffer, and then fixed with 4% PFA, 0.1% glutaraldehyde during 10 min at 37°C.  
3 Samples were then permeabilized if mentioned with 0.1% triton for 4 minutes and incubated  
4 sequentially with primary and secondary antibodies. Video-imaging of hippocampal neurons  
5 (first day *in vitro*) was performed on a Zeiss 880 confocal on gasp detectors, with 561 nm  
6 laser line set at 0.2%. Image were acquired every 2 min during 13 hours in Krebs ringer  
7 medium containing 200 nM MemBright Cy3.5. The signal in supplementary movie 5 was not  
8 processed neither for the noise nor the photo-bleaching (raw data).

9

10

### 11 **dSTORM**

12 HeLa cells were cultured as mentioned above. The cells were fixed with 4% PFA during 10  
13 minutes. The PM labelling was performed by incubating the cells with 20 nM MB-Cy3.5 in  
14 Opti-MEM during 10 minutes. All non-bound dyes were removed by 3 consecutive washing  
15 with PBS. dSTORM imaging was performed on a home built setup based on a Olympus IX-71  
16 inverted microscope with a high-numerical aperture (NA) TIRF objective (Apo TIRF 100 × , oil,  
17 NA 1.49, Olympus).<sup>76</sup> The samples were imaged in a photoswitching buffer containing 100  
18 mM MEA and an oxygen scavenging system (0.5 mg/mL glucose oxidase, 40 µg/mL catalase,  
19 10% glucose) in PBS. All chemicals were purchased from Sigma-Aldrich. Samples were  
20 illuminated with a 532 nm laser (75 mW, Cobolt) and a 405 nm laser (25 mW, Spectra  
21 Physics) was used for the activation of the fluorophores. The signal was recorded on an EM-  
22 CCD camera (ImagEM, Hamamatsu) (0.106 µm pixel size) with a typical integration time of  
23 8.7 ms. The acquired stacks were processed with ImageJ software<sup>77</sup> and the dSTORM images  
24 were reconstructed from a series of 6000 frames using the Thunder STORM plug-in.<sup>78</sup>  
25 Acquired images were filtered with a wavelet filter and the approximate fluorophore  
26 positions were found by setting the threshold value equal to the standard deviation of the  
27 1st wavelet function. Then, precise subpixel localizations were determined by fitting the  
28 spots with the Gaussian PSF by weighted least squares method. High-resolution images were  
29 reconstructed from obtained localizations and plotted as a histogram with 20 nm pixel size.  
30 Stochastic optical reconstruction microscopy (STORM) neuronal imaging was performed on a  
31 Vutara microscope (Bruker) with a high-numerical aperture (NA) objective (60x, water, NA  
32 1.2, Olympus). 170 nm coverslips (Menzel glaser 18 mm diameter #1.5) were mounted on a  
33 glass slide with a 15 mm hole. The hole was filled with imaging buffer (Tris 50 mM, NaCl 10  
34 mM, 10% glucose, 100 mM MEA, 70 U/mL glucose oxidase (Sigma G0543), 20 g/mL catalase)

1 and sealed with Picodent twinsil. Samples were illuminated successively with a 647 and 561  
2 nm laser and a 405 nm laser for the reactivation of the fluorophores. Neurons were isolated  
3 with wide field mosaic microscopy (Cool snap camera) and then imaged for STORM for a  
4 series of 30,000-100,000 images with a FLASH4 CMOS camera (20 ms, 20 × 20 microns). 3D-  
5 STORM imaging was performed using the bi-plane module allowing the localisation in the  
6 xyz direction. The Srx software (Bruker) was used to localise particles in 3D. Correction for  
7 chromatic aberration in super-resolution microscopy has been done using multispectral  
8 (blue/green/orange/dark red) Tetraspeck beads (Thermofisher T7279) in Bruker's software.

9

## 10 **Acknowledgements**

11

12 This work was supported by the European Research Council ERC Consolidator grant  
13 BrightSens 648528 and ANR grant (ANR-10-INBS-04). We thank Doriane Heimbürger for the  
14 KB cell culture, Romain Vauchelles for his assistance at the PIQ platform, Pauline Meyer for  
15 the mass measurements, Bohdan Wasylyk for providing the KB cells and Dr. Florence Toti  
16 and Mohamad Kassem for providing fresh rat liver tissues. We acknowledge the ImagoSeine  
17 core facility of the Institut Jacques Monod, member of IBiSA and the France-BioImaging  
18 infrastructure. We thank Dr. Carl G. Ebeling (Worldwide Application Scientist for Bruker  
19 Fluorescence Microscopy) for his help with the use of the Bruker Vutara system and its SRX  
20 visualisation and analysis software for rendering localisation data. We thank the Neurlmag  
21 imaging facility of the Institute of Psychiatry and Neuroscience of Paris, and the national  
22 research group in Microscopy of the living (GDR ImaBio) for promoting meetings allowing  
23 inter-disciplinary collaborations.

24

## 25 **Author contributions**

26

27 MC and ASK planned the project. MC synthesized, purified and characterized the MemBright  
28 and led the spectroscopy experiments with PA and ASK. PA studied the spectroscopic and  
29 two-photon properties. Cell imaging was performed by MC, PA and HA (HeLa d-STORM).  
30 Two-photon tissue imaging was realized by OF and LD. EB led the cytotoxicity evaluation. LD  
31 led the tissue and neuronal imaging as well as the super resolution imaging. YM, TG and ASK  
32 contributed materials and analysis tools. MC, LD and ASK wrote the manuscript with some  
33 assistance from other co-authors.

34

1

2

3 **References**

4

5 1. Lingwood, D. & Simons, K. Lipid Rafts As a Membrane-Organizing Principle. *Science* **327**,  
6 46–50 (2010).

7 2. Rello, S. *et al.* Morphological criteria to distinguish cell death induced by apoptotic and  
8 necrotic treatments. *Apoptosis* **10**, 201–208 (2005).

9 3. Matsuzaki, M., Honkura, N., Ellis-Davies, G. C. R. & Kasai, H. Structural basis of long-term  
10 potentiation in single dendritic spines. *Nature* **429**, 761–766 (2004).

11 4. Lavis, L. D. & Raines, R. T. Bright Ideas for Chemical Biology. *ACS Chem. Biol.* **3**, 142–155  
12 (2008).

13 5. Fernández-Suárez, M. & Ting, A. Y. Fluorescent probes for super-resolution imaging in  
14 living cells. *Nat. Rev. Mol. Cell Biol.* **9**, 929–943 (2008).

15 6. Neto, B. A. D., Corrêa, J. R. & Silva, R. G. Selective mitochondrial staining with small  
16 fluorescent probes: importance, design, synthesis, challenges and trends for new  
17 markers. *RSC Adv.* **3**, 5291–5301 (2013).

18 7. Collot, M. *et al.* Ultrabright and Fluorogenic Probes for Multicolor Imaging and Tracking  
19 of Lipid Droplets in Cells and Tissues. *J. Am. Chem. Soc.* (2018).  
20 doi:10.1021/jacs.7b12817

21 8. Arai, S., Lee, S.-C., Zhai, D., Suzuki, M. & Chang, Y. T. A Molecular Fluorescent Probe for  
22 Targeted Visualization of Temperature at the Endoplasmic Reticulum. *Sci. Rep.* **4**, 6701  
23 (2014).

24 9. Life Technologies. Available at: <https://www.thermofisher.com/>.

25 10. Despras, G. *et al.* H-Rubies, a new family of red emitting fluorescent pH sensors for living  
26 cells. *Chem. Sci.* **6**, 5928–5937 (2015).

- 1 11. Chen, X. *et al.* Lysosomal Targeting with Stable and Sensitive Fluorescent Probes  
2 (Superior LysoProbes): Applications for Lysosome Labeling and Tracking during  
3 Apoptosis. *Sci. Rep.* **5**, 9004 (2015).
- 4 12. Klymchenko, A. S. & Kreder, R. Fluorescent Probes for Lipid Rafts: From Model  
5 Membranes to Living Cells. *Chem. Biol.* **21**, 97–113 (2014).
- 6 13. Owen, D. M., Williamson, D. J., Magenau, A. & Gaus, K. Sub-resolution lipid domains  
7 exist in the plasma membrane and regulate protein diffusion and distribution. *Nat.*  
8 *Commun.* **3**, 1256 (2012).
- 9 14. Ziomkiewicz, I. *et al.* Dynamic conformational transitions of the EGF receptor in living  
10 mammalian cells determined by FRET and fluorescence lifetime imaging microscopy.  
11 *Cytometry A* **83**, 794–805 (2013).
- 12 15. Solanko, L. M. *et al.* Membrane Orientation and Lateral Diffusion of BODIPY-Cholesterol  
13 as a Function of Probe Structure. *Biophys. J.* **105**, 2082–2092 (2013).
- 14 16. Honigmann, A. *et al.* Scanning STED-FCS reveals spatiotemporal heterogeneity of lipid  
15 interaction in the plasma membrane of living cells. *Nat. Commun.* **5**, 5412 (2014).
- 16 17. Niko, Y., Didier, P., Mely, Y., Konishi, G. & Klymchenko, A. S. Bright and photostable  
17 push-pull pyrene dye visualizes lipid order variation between plasma and intracellular  
18 membranes. *Sci. Rep.* **6**, 18870 (2016).
- 19 18. Kreder, R. *et al.* Blue fluorogenic probes for cell plasma membranes fill the gap in  
20 multicolour imaging. *Rsc Adv.* **5**, 22899–22905 (2015).
- 21 19. Shynkar, V. V. *et al.* Fluorescent Biomembrane Probe for Ratiometric Detection of  
22 Apoptosis. *J. Am. Chem. Soc.* **129**, 2187–2193 (2007).
- 23 20. Kucherak, O. A. *et al.* Switchable Nile Red-Based Probe for Cholesterol and Lipid Order at  
24 the Outer Leaflet of Biomembranes. *J. Am. Chem. Soc.* **132**, 4907–4916 (2010).
- 25 21. Kwiatek, J. M. *et al.* Characterization of a New Series of Fluorescent Probes for Imaging  
26 Membrane Order. *Plos One* **8**, e52960 (2013).

- 1 22. López-Duarte, I., Vu, T. T., Izquierdo, M. A., Bull, J. A. & Kuimova, M. K. A molecular rotor  
2 for measuring viscosity in plasma membranes of live cells. *Chem. Commun.* **50**, 5282–  
3 5284 (2014).
- 4 23. Zhang, X., Wang, C., Jin, L., Han, Z. & Xiao, Y. Photostable Bipolar Fluorescent Probe for  
5 Video Tracking Plasma Membranes Related Cellular Processes. *ACS Appl. Mater.*  
6 *Interfaces* **6**, 12372–12379 (2014).
- 7 24. Heek, T. *et al.* An Amphiphilic Perylene Imido Diester for Selective Cellular Imaging.  
8 *Bioconjug. Chem.* **24**, 153–158 (2013).
- 9 25. Dal Molin, M. *et al.* Fluorescent Flippers for Mechanosensitive Membrane Probes. *J. Am.*  
10 *Chem. Soc.* **137**, 568–571 (2015).
- 11 26. Fin, A., Jentsch, A. V., Sakai, N. & Matile, S. Oligothiophene Amphiphiles as Planarizable  
12 and Polarizable Fluorescent Membrane Probes. *Angew. Chem.-Int. Ed.* **51**, 12736–12739  
13 (2012).
- 14 27. Cui, Q. *et al.* Binding-Directed Energy Transfer of Conjugated Polymer Materials for Dual-  
15 Color Imaging of Cell Membrane. *Chem. Mater.* **28**, 4661–4669 (2016).
- 16 28. Wang, H.-Y. *et al.* Imaging plasma membranes without cellular internalization: multisite  
17 membrane anchoring reagents based on glycol chitosan derivatives. *J. Mater. Chem. B* **3**,  
18 6165–6173 (2015).
- 19 29. Jiang, Y.-W. *et al.* In Situ Visualization of Lipid Raft Domains by Fluorescent Glycol  
20 Chitosan Derivatives. *Langmuir ACS J. Surf. Colloids* **32**, 6739–6745 (2016).
- 21 30. Yuan, L., Lin, W., Zheng, K., He, L. & Huang, W. Far-red to near infrared analyte-  
22 responsive fluorescent probes based on organic fluorophore platforms for fluorescence  
23 imaging. *Chem. Soc. Rev.* **42**, 622–661 (2012).
- 24 31. Umezawa, K., Citterio, D. & Suzuki, K. New Trends in Near-Infrared Fluorophores for  
25 Bioimaging. *Anal. Sci.* **30**, 327–349 (2014).

- 1 32. Collot, M. *et al.* Bright fluorogenic squaraines with tuned cell entry for selective imaging  
2 of plasma membrane vs. endoplasmic reticulum. *Chem. Commun.* **51**, 17136–17139  
3 (2015).
- 4 33. Gonçalves, M. S. T. Fluorescent Labeling of Biomolecules with Organic Probes. *Chem.*  
5 *Rev.* **109**, 190–212 (2009).
- 6 34. Hou, T.-C., Wu, Y.-Y., Chiang, P.-Y. & Tan, K.-T. Near-infrared fluorescence activation  
7 probes based on disassembly-induced emission cyanine dye. *Chem. Sci.* **6**, 4643–4649  
8 (2015).
- 9 35. van de Linde, S. *et al.* Direct stochastic optical reconstruction microscopy with standard  
10 fluorescent probes. *Nat. Protoc.* **6**, 991–1009 (2011).
- 11 36. Würthner, F., Kaiser, T. E. & Saha-Möller, C. R. J-Aggregates: From Serendipitous  
12 Discovery to Supramolecular Engineering of Functional Dye Materials. *Angew. Chem. Int.*  
13 *Ed.* **50**, 3376–3410 (2011).
- 14 37. Gousset, K. *et al.* Prions hijack tunnelling nanotubes for intercellular spread. *Nat. Cell*  
15 *Biol.* **11**, 328–336 (2009).
- 16 38. Helmchen, F. & Denk, W. Deep tissue two-photon microscopy. *Nat. Methods* **2**, 932–940  
17 (2005).
- 18 39. Svoboda, K. & Yasuda, R. Principles of Two-Photon Excitation Microscopy and Its  
19 Applications to Neuroscience. *Neuron* **50**, 823–839 (2006).
- 20 40. Yao, S. & Belfield, K. D. Two-Photon Fluorescent Probes for Bioimaging. *Eur. J. Org.*  
21 *Chem.* **2012**, 3199–3217 (2012).
- 22 41. Lukomska, J. *et al.* Two-photon induced fluorescence of Cy5-DNA in buffer solution and  
23 on silver island films. *Biochem. Biophys. Res. Commun.* **328**, 78–84 (2005).
- 24 42. Kobat, D. *et al.* Deep tissue multiphoton microscopy using longer wavelength excitation.  
25 *Opt. Express* **17**, 13354 (2009).



- 1 43. Albota, M. A., Xu, C. & Webb, W. W. Two-photon fluorescence excitation cross sections  
2 of biomolecular probes from 690 to 960 nm. *Appl. Opt.* **37**, 7352 (1998).
- 3 44. Kim, H. M. & Cho, B. R. Small-Molecule Two-Photon Probes for Bioimaging Applications.  
4 *Chem. Rev.* **115**, 5014–5055 (2015).
- 5 45. Guo, L. *et al.* Styrylpyridine salts-based red emissive two-photon turn-on probe for  
6 imaging the plasma membrane in living cells and tissues. *Analyst* **141**, 3228–3232  
7 (2016).
- 8 46. Rasia-Filho, A. R.-F. Dendritic spines observed by extracellular Dil dye and  
9 immunolabeling under confocal microscopy. *Protoc. Exch.* (2010).  
10 doi:10.1038/nprot.2010.153
- 11 47. Feng, G. *et al.* Imaging Neuronal Subsets in Transgenic Mice Expressing Multiple Spectral  
12 Variants of GFP. *Neuron* **28**, 41–51 (2000).
- 13 48. Ricard, C. & Debarbieux, F. C. Six-color intravital two-photon imaging of brain tumors  
14 and their dynamic microenvironment. *Front. Cell. Neurosci.* **8**, 57 (2014).
- 15 49. Danglot, L., Triller, A. & Bessis, A. Association of gephyrin with synaptic and  
16 extrasynaptic GABA<sub>A</sub> receptors varies during development in cultured hippocampal  
17 neurons. *Mol. Cell. Neurosci.* **23**, 264–278 (2003).
- 18 50. Revelo, N. H. *et al.* A new probe for super-resolution imaging of membranes elucidates  
19 trafficking pathways. *J Cell Biol* **205**, 591–606 (2014).
- 20 51. Revelo, N. H. & Rizzoli, S. O. The Membrane Marker mCLING Reveals the Molecular  
21 Composition of Trafficking Organelles. in *Current Protocols in Neuroscience* (John Wiley  
22 & Sons, Inc., 2001). doi:10.1002/0471142301.ns0225s74
- 23 52. Dequidt, C. *et al.* Fast Turnover of L1 Adhesions in Neuronal Growth Cones Involving  
24 Both Surface Diffusion and Exo/Endocytosis of L1 Molecules. *Mol. Biol. Cell* **18**, 3131–  
25 3143 (2007).

- 1 53. Kasai, H., Fukuda, M., Watanabe, S., Hayashi-Takagi, A. & Noguchi, J. Structural  
2 dynamics of dendritic spines in memory and cognition. *Trends Neurosci.* **33**, 121–129  
3 (2010).
- 4 54. Huang, B., Babcock, H. & Zhuang, X. Breaking the Diffraction Barrier: Super-Resolution  
5 Imaging of Cells. *Cell* **143**, 1047–1058 (2010).
- 6 55. Rust, M. J., Bates, M. & Zhuang, X. Sub-diffraction-limit imaging by stochastic optical  
7 reconstruction microscopy (STORM). *Nat. Methods* **3**, 793–795 (2006).
- 8 56. Betzig, E. *et al.* Imaging Intracellular Fluorescent Proteins at Nanometer Resolution.  
9 *Science* **313**, 1642–1645 (2006).
- 10 57. Hess, S. T., Girirajan, T. P. K. & Mason, M. D. Ultra-high resolution imaging by  
11 fluorescence photoactivation localization microscopy. *Biophys. J.* **91**, 4258–4272 (2006).
- 12 58. Porrero, C., Rubio-Garrido, P., Avendaño, C. & Clascá, F. Mapping of fluorescent protein-  
13 expressing neurons and axon pathways in adult and developing Thy1-eYFP-H transgenic  
14 mice. *Brain Res.* **1345**, 59–72 (2010).
- 15 59. Horikawa, K. & Armstrong, W. E. A versatile means of intracellular labeling: injection of  
16 biocytin and its detection with avidin conjugates. *J. Neurosci. Methods* **25**, 1–11 (1988).
- 17 60. Honig, M. G. & Hume, R. I. Fluorescent carbocyanine dyes allow living neurons of  
18 identified origin to be studied in long-term cultures. *J. Cell Biol.* **103**, 171–187 (1986).
- 19 61. Lanciego, J. L. & Wouterlood, F. G. A half century of experimental neuroanatomical  
20 tracing. *J. Chem. Neuroanat.* **42**, 157–183 (2011).
- 21 62. Chevalier, A. C. & Rosenberger, T. A. Increasing acetyl-CoA metabolism attenuates injury  
22 and alters spinal cord lipid content in mice subjected to experimental autoimmune  
23 encephalomyelitis. *J. Neurochem.* **141**, 721–737 (2017).
- 24 63. Whitney, M. A. *et al.* Fluorescent peptides highlight peripheral nerves during surgery in  
25 mice. *Nat. Biotechnol.* **29**, 352–356 (2011).

- 1 64. Dani, A., Huang, B., Bergan, J., Dulac, C. & Zhuang, X. Superresolution Imaging of  
2 Chemical Synapses in the Brain. *Neuron* **68**, 843–856 (2010).
- 3 65. Herrmannsdörfer, F. *et al.* 3D d STORM Imaging of Fixed Brain Tissue. *Methods Mol. Biol.*  
4 *Clifton NJ* **1538**, 169–184 (2017).
- 5 66. Beghin, A. *et al.* Localization-based super-resolution imaging meets high-content  
6 screening. *Nat. Methods* **14**, 1184–1190 (2017).
- 7 67. Lagache, T. *et al.* Mapping molecular assemblies with fluorescence microscopy and  
8 object-based spatial statistics. *Nat. Commun.* **9**, 698 (2018).
- 9 68. Levet, F. *et al.* SR-Tesseler: a method to segment and quantify localization-based super-  
10 resolution microscopy data. *Nat. Methods* **12**, 1065–1071 (2015).
- 11 69. Hope, M. J., Bally, M. B., Webb, G. & Cullis, P. R. Production of large unilamellar vesicles  
12 by a rapid extrusion procedure: characterization of size distribution, trapped volume  
13 and ability to maintain a membrane potential. *Biochim. Biophys. Acta* **812**, 55–65 (1985).
- 14 70. Rurack, K. & Spieles, M. Fluorescence Quantum Yields of a Series of Red and Near-  
15 Infrared Dyes Emitting at 600–1000 nm. *Anal. Chem.* **83**, 1232–1242 (2011).
- 16 71. Texier, I. *et al.* Cyanine-loaded lipid nanoparticles for improved in vivo fluorescence  
17 imaging. *J. Biomed. Opt.* **14**, 054005-054005-11 (2009).
- 18 72. Alessi, A., Salvalaggio, M. & Ruzzon, G. Rhodamine 800 as reference substance for  
19 fluorescence quantum yield measurements in deep red emission range. *J. Lumin.* **134**,  
20 385–389 (2013).
- 21 73. Benson, R. & Kues, H. Fluorescence Properties of Indocyanine Green as Related to  
22 Angiography. *Phys. Med. Biol.* **23**, 159–163 (1978).
- 23 74. Clamme, J. P., Azoulay, J. & Mély, Y. Monitoring of the Formation and Dissociation of  
24 Polyethylenimine/DNA Complexes by Two Photon Fluorescence Correlation  
25 Spectroscopy. *Biophys. J.* **84**, 1960–1968 (2003).

- 1 75. Banker, G. A. & Cowan, W. M. Rat hippocampal neurons in dispersed cell culture. *Brain*  
2 *Res.* **126**, 397–342 (1977).
- 3 76. Kempf, N., Didier, P., Postupalenko, V., Bucher, B. & Mély, Y. Internalization mechanism  
4 of neuropeptide Y bound to its Y 1 receptor investigated by high resolution microscopy.  
5 *Methods Appl. Fluoresc.* **3**, 025004 (2015).
- 6 77. Schneider, C. A., Rasband, W. S. & Eliceiri, K. W. NIH Image to ImageJ: 25 years of image  
7 analysis. *Nat. Methods* **9**, 671–675 (2012).
- 8 78. Ovesný, M., Křížek, P., Borkovec, J., Švindrych, Z. & Hagen, G. M. ThunderSTORM: a  
9 comprehensive ImageJ plug-in for PALM and STORM data analysis and super-resolution  
10 imaging. *Bioinformatics* **30**, 2389–2390 (2014).
- 11

## Figure 1

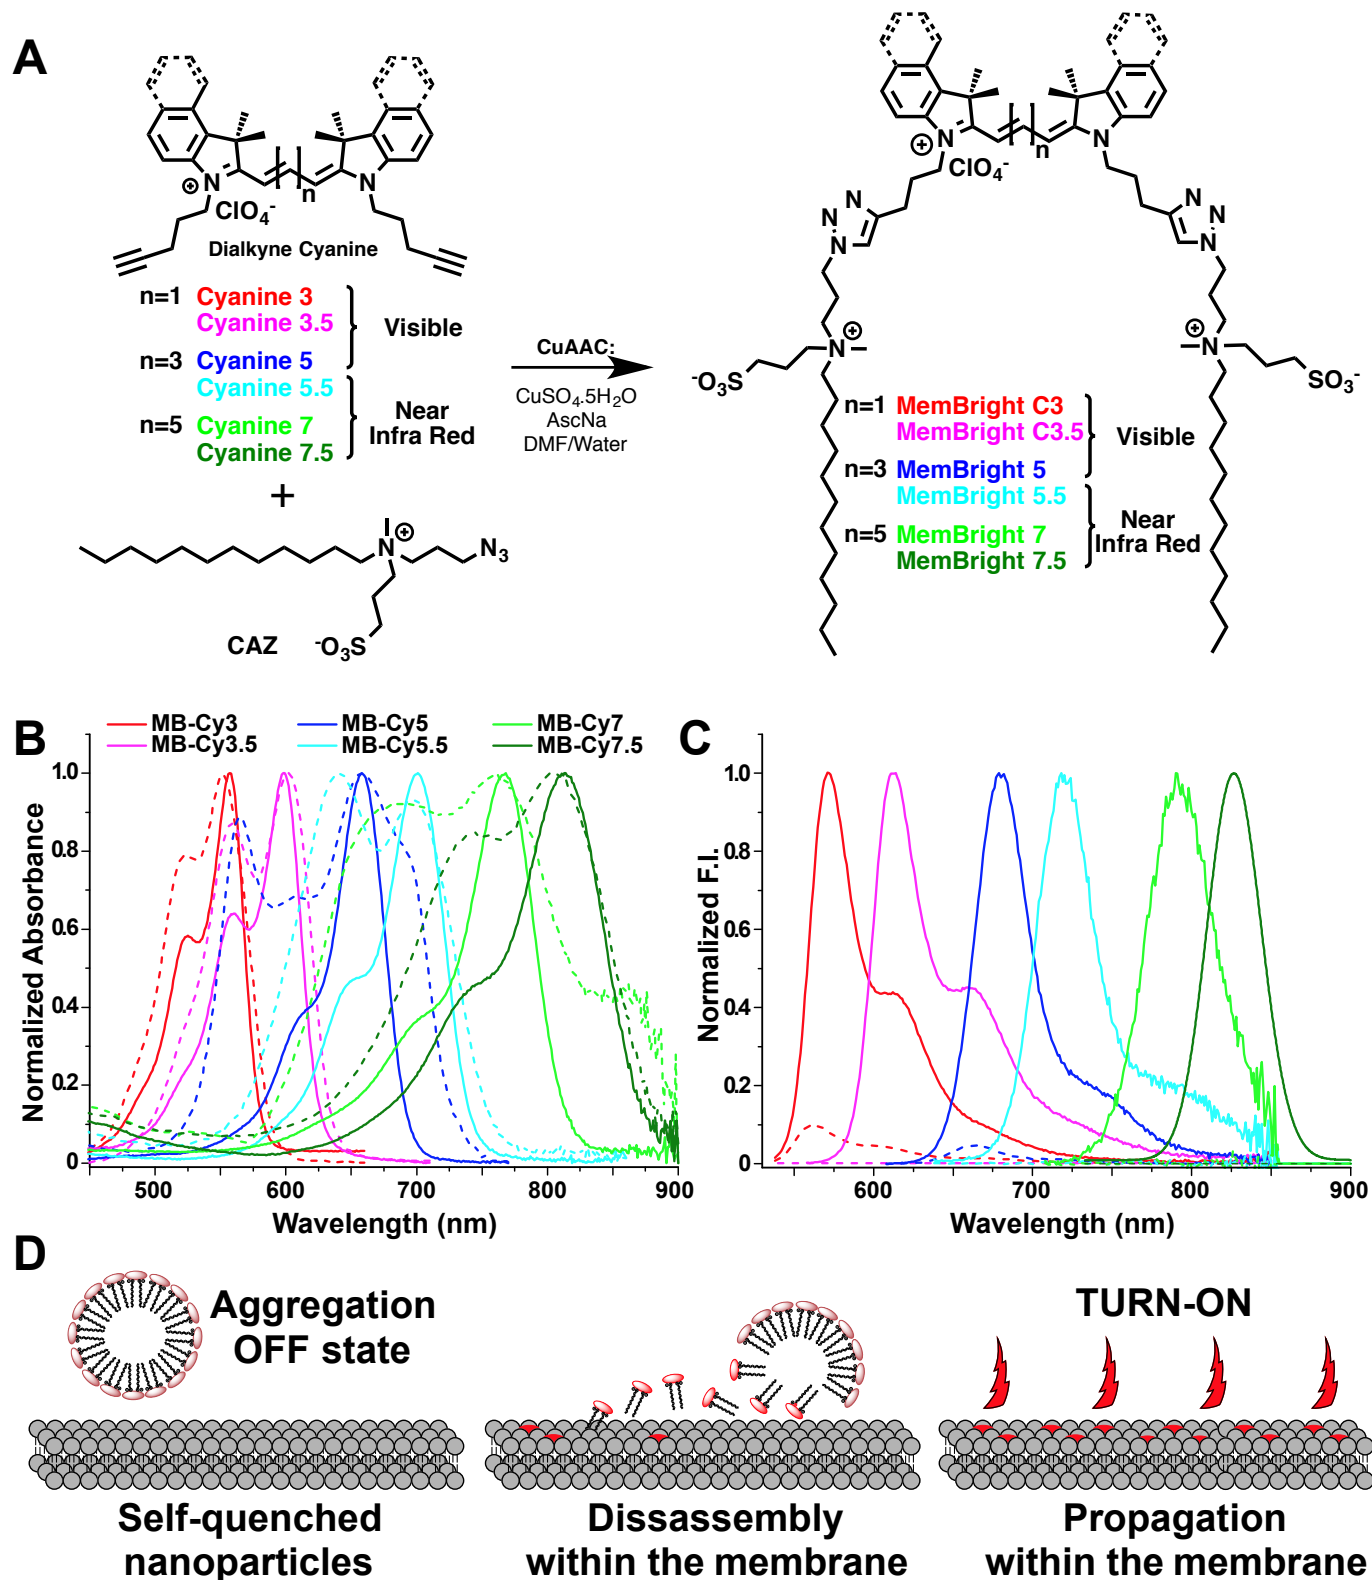

**Figure 1. MemBright probes and their properties.** Synthesis of the MemBright markers (A). Absorption (B) and emission spectra (C) of MemBright probes (200 nM) in the absence (dashed lines) or in the presence of DOPC vesicles (200  $\mu\text{M}$  lipids, solid lines) in phosphate buffer 20 mM, pH 7.4. The full-corrected emission spectra beyond 850 nm were obtained by using the GaussAmp function fit. (D) Turn-on mechanism of the MemBright probes.



## Figure 2

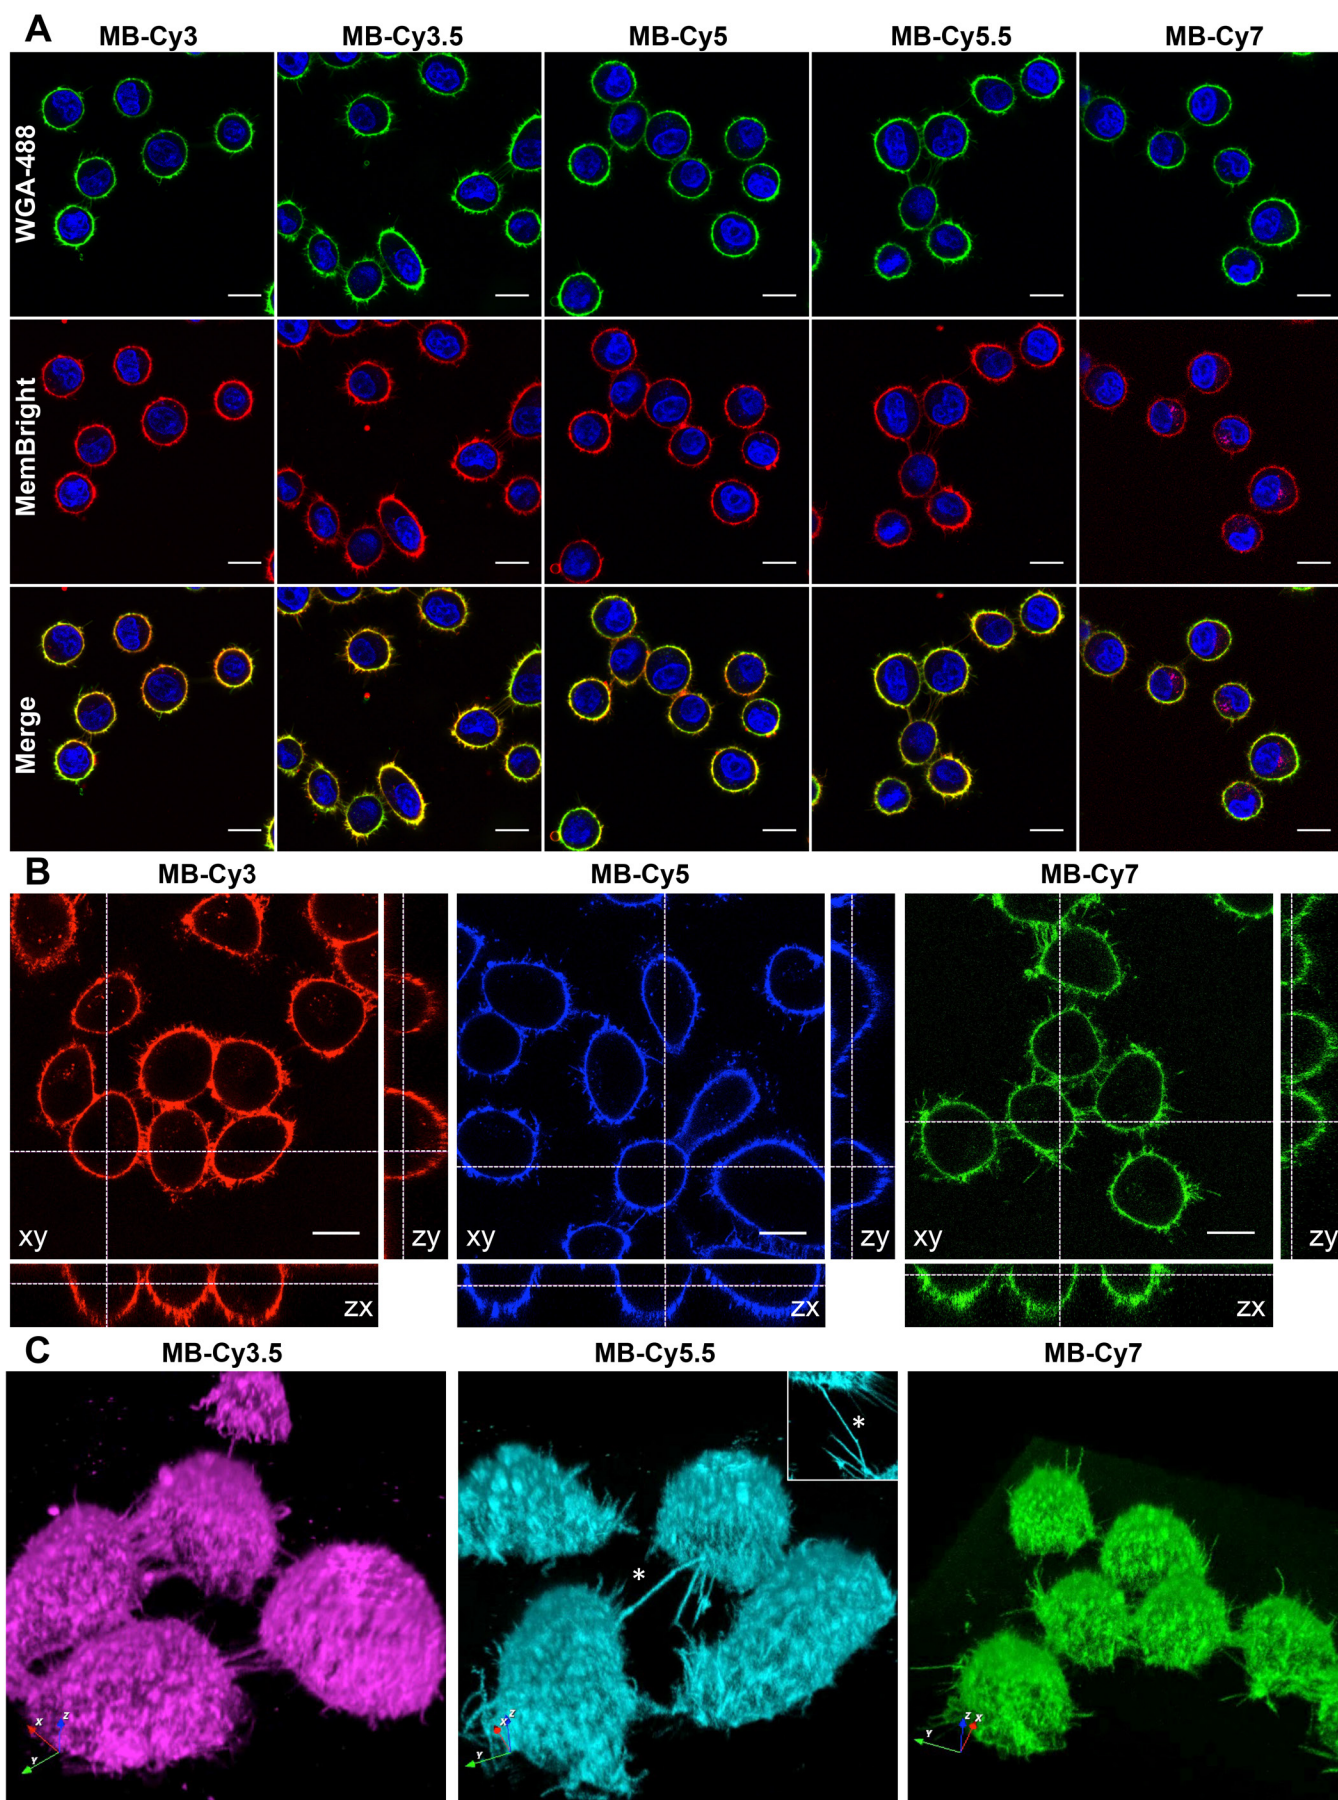

**Figure 2. 2D and 3D confocal live cell imaging using MemBright.** (A) Laser scanning confocal microscopy of live KB cells labelled by 20 nM MemBright probes. Images were taken 5 min after addition of the probes (except for MB-Cy7, 15 min) without any washing step. WGA-488 was used as a co-staining marker (ex: 488 nm). Nuclear staining was done with Hoechst (5 µg/mL). (B) Orthogonal projection obtained from Z-stacks (for MB-Cy3.5 and MB-Cy5.5 see Figure S10 and S11). Scale bar is 15 µm. The microscope settings were: Hoechst 33342: ex: 405 nm with 420 and 470 nm detection range; WGA-AlexaFluor®488: ex: 488 nm with 500 and 550 nm detection range. MB-Cy3 and MB-Cy3.5, ex: 561 nm with 567-750 nm detection range. MB-Cy5, MB-Cy5.5 and MB-Cy7, 635 nm laser was used with 640-800 nm detection range. (C) 3D reconstruction of live KB cells stained with MemBright. Inset in B is the top view of the intercellular nanotube indicated by the white star.



### Figure 3

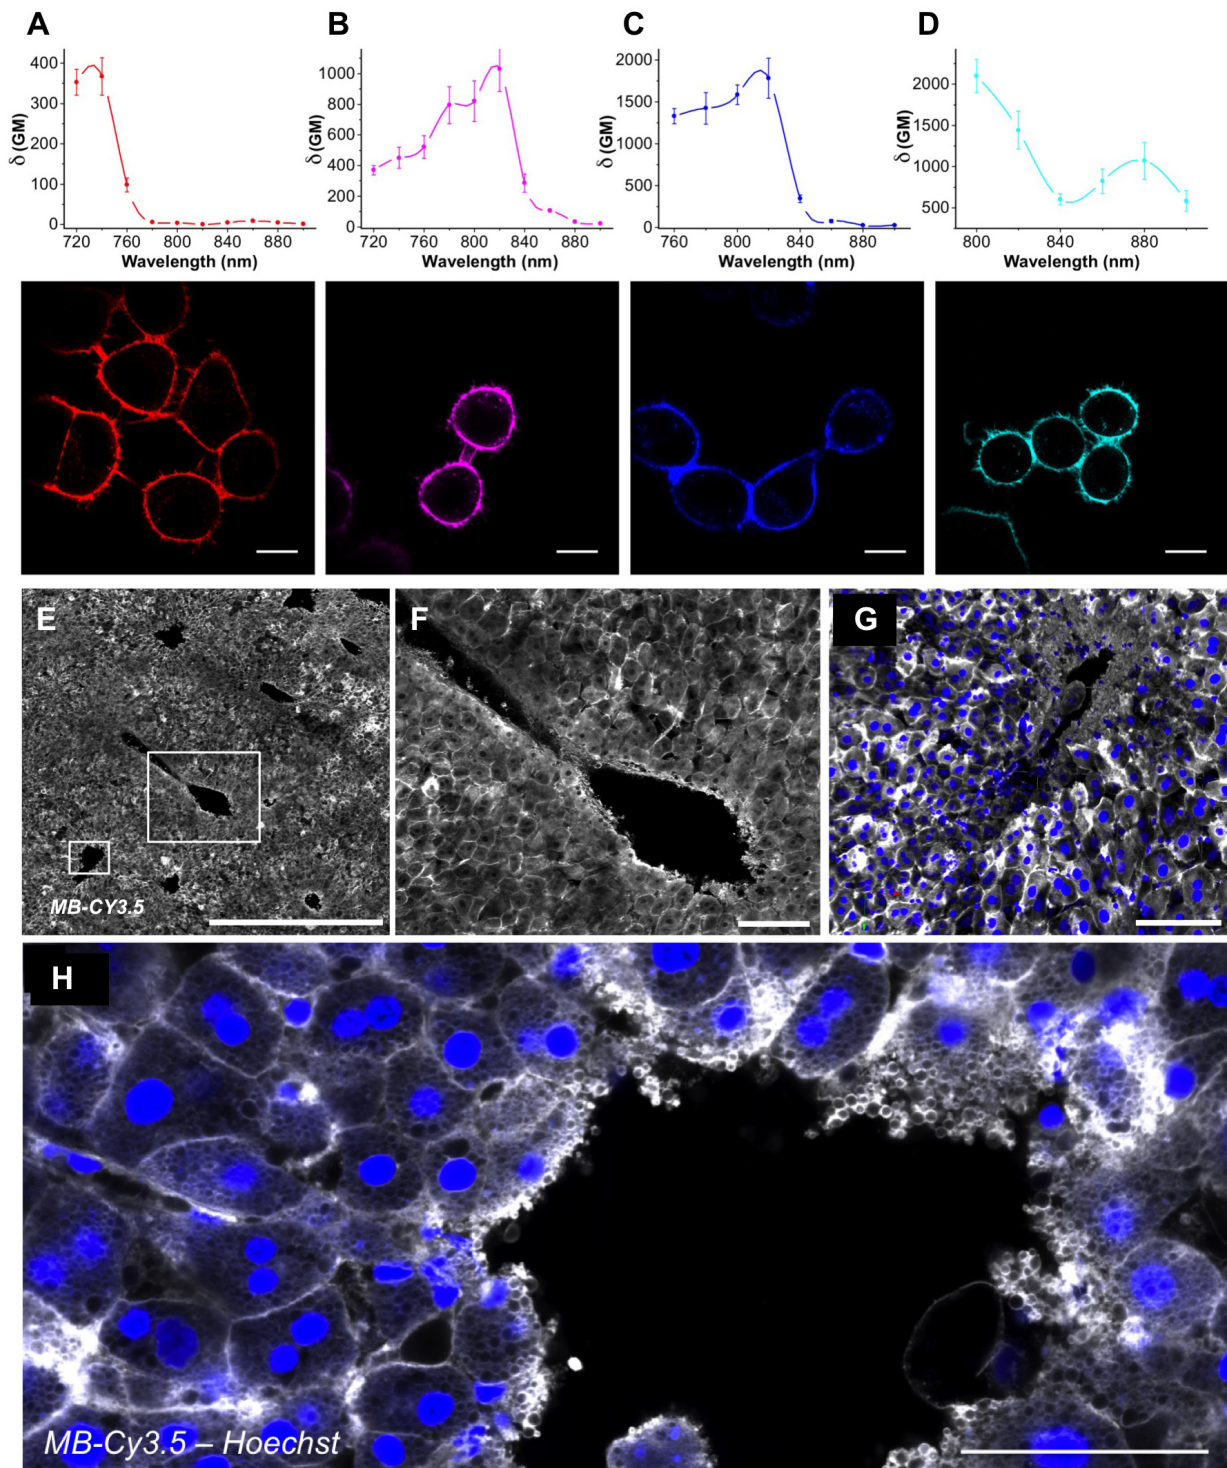

**Figure 3. Two-photon properties and imaging.** (A-D) TPE cross-section spectra (DMSO) and two-photon microscopy images of KB cells using MB-Cy3 (A), MB-Cy3.5 (B), MB-Cy5 (C) and MB-Cy5.5 (D). The images were obtained without any washing step. Conditions: MB-Cy3 at 40 nM,  $\lambda_{Ex}$  = 760 nm (Red), MB-Cy3.5 at 40 nM,  $\lambda_{Ex}$  = 810 nm (Magenta), MB-Cy5 at 40 nM,  $\lambda_{Ex}$  = 810 nm (Blue), MB-Cy5.5 at 120 nM,  $\lambda_{Ex}$  = 860 nm (Cyan). The signal was collected using a short-pass filter with 700 nm cut-off wavelength, which explained the use of MB-Cy5.5 at higher concentration. Laser power was set to 5 mW. Each image is the average of five acquisitions. Scale bar is 10  $\mu$ m. (E) Tile confocal imaging of 1 mm thick liver slices incubated with MB-Cy3.5. The mosaic is composed of 4x4 fields of 20x pictures. Scale bar is 1 mm. The big and small white square correspond to the magnification in F and G-H, which shows the central vein of the hepatic lobe (G) 3D rendering of the 20x stack (101 Z slices, 55  $\mu$ m thick), scale bar is 100  $\mu$ m. MB-Cy3.5 is resistant to continuous illumination and allows detection of cells and tissue arrangement without any other counterstaining. (H) Confocal 63X zoom around the central vein. MB-Cy3.5 labels the PM but also the intracellular hepatic vesicles of the cells which have been cut during slicing. Scale bar is 50  $\mu$ m.



## Figure 4

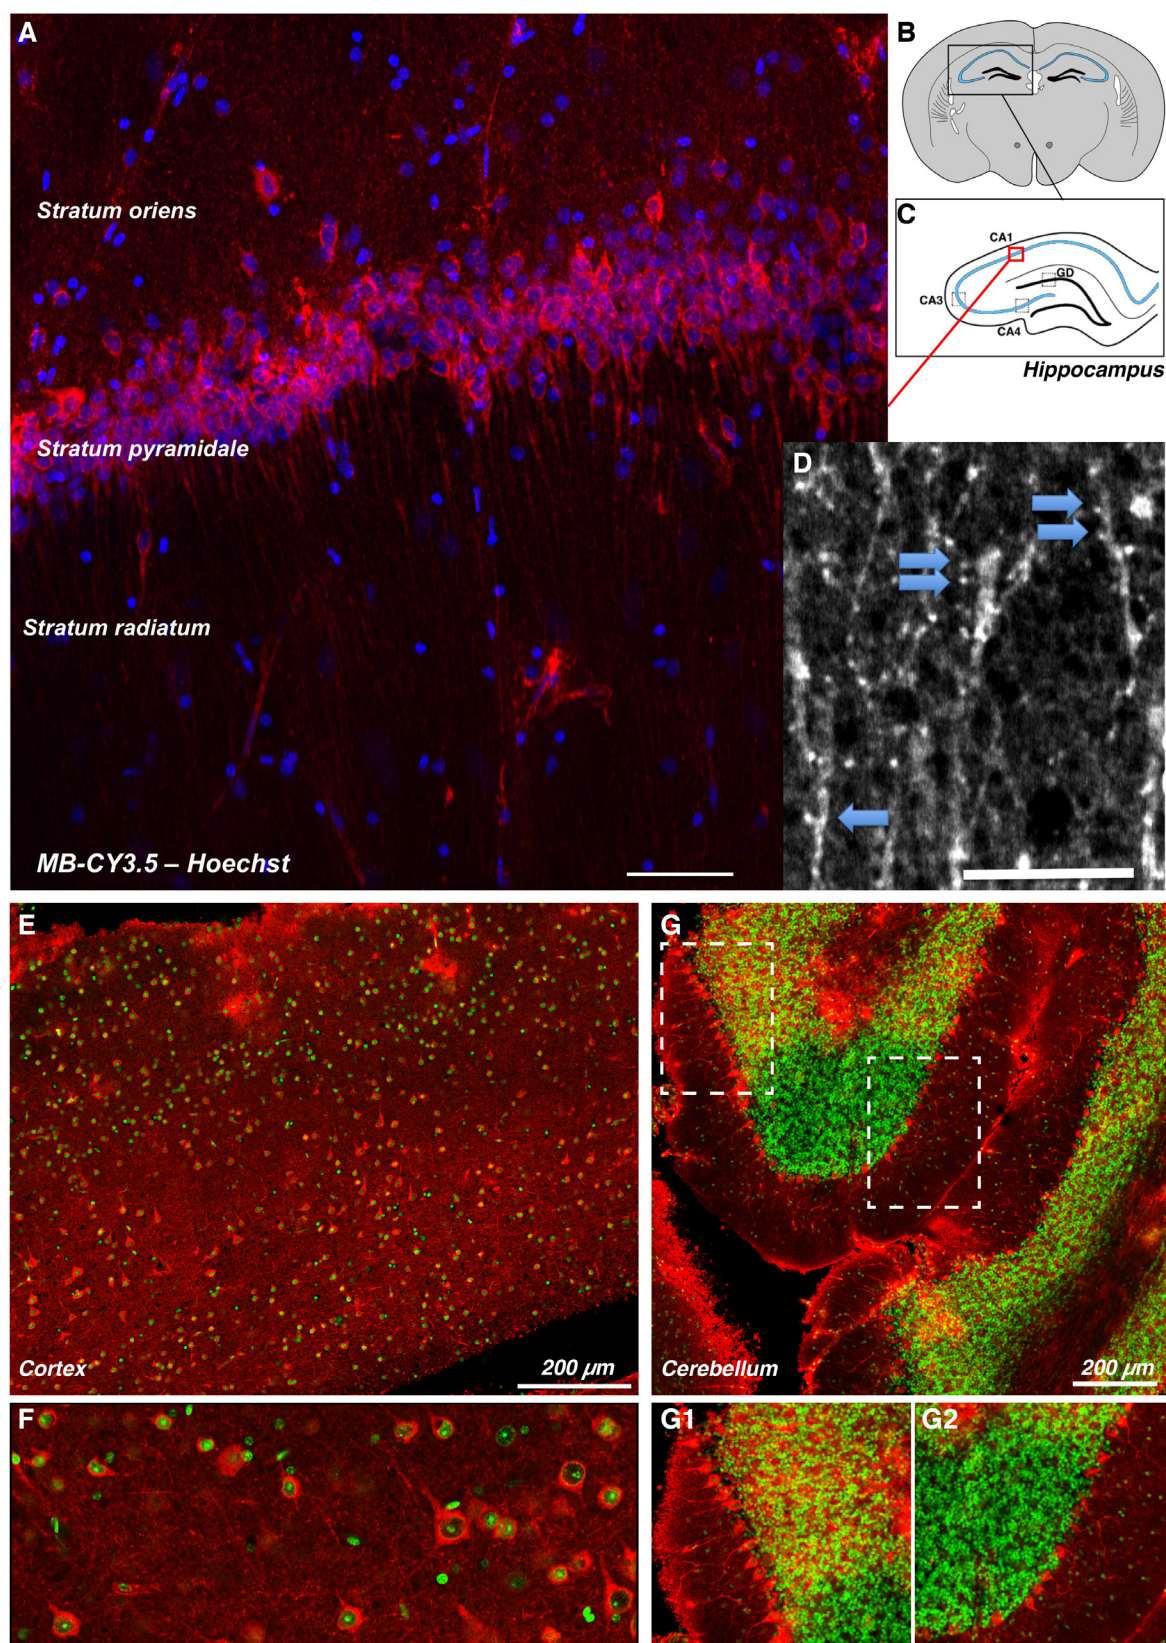

**Figure 4. Neuronal imaging in brain slices.** (A) Z projection of two-photon imaging of live 1 mm thick brain slices incubated with MB-Cy3.5 and Hoechst. 90 images were acquired every 0.4  $\mu\text{m}$  and were stacked providing a 36  $\mu\text{m}$  depth. Scale bar 60  $\mu\text{m}$ . The red box shown in C corresponds to a zoom in stratum pyramidale of CA1 region (C) of the hippocampus (B). Two-photon imaging allows the detection of some dendritic spine in stratum radiatum (D, arrows). (E) Tile confocal imaging of 1 mm thick live cortex incubated with MB-Cy3.5. Scale bar is 200  $\mu\text{m}$ . (F) Two-photon imaging showing strong labelling in cortical neurons, scale bar is 100  $\mu\text{m}$ . (G) Confocal imaging of the cerebellum. G1 and G2, which shows the labelling of Purkinje cells, correspond to magnifications of the white squares in G. Scale bar is 200  $\mu\text{m}$ .



## Figure 5

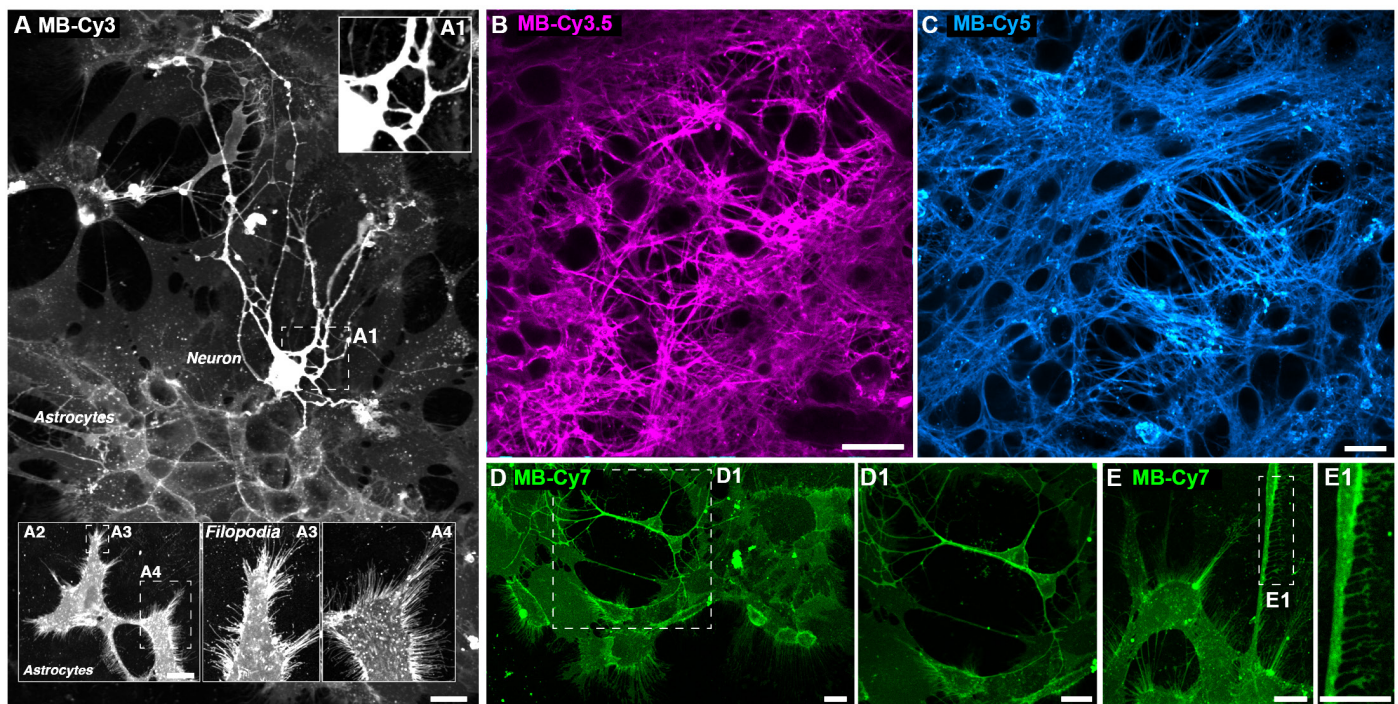

**Figure 5. Confocal microscopy of hippocampal primary neurons and astrocytes labelled with MemBright probes.** Images were taken 10-15 minutes after addition of the probes (20 nM) without any washing step. (A) Hippocampal neurons appear in a brighter manner and can be identified on astrocytes the latter being either confluent (as shown in A) or isolated (A2). Zooms in the PM show how the MemBright allow detection of very fine membrane protrusion in astrocytes (filopodia in A3 or A4) or in neuronal cells (dendritic processes in A1). (B-C) Live dense neuronal network is labelled with 20 nM MB-Cy3.5 (B) or 20 nM MB-Cy5 (C) and imaged with spinning disc microscopy. (D-E) Example of astrocytic layers and isolated neurons labelled with 200 nM MB-Cy7 excited with 633 nm laser and imaged with laser confocal scanning microscopy. Even in the near infrared region, membrane details can be unravelled with the probe both on neuronal (D1) and glial cells (see fine filopodia in E1). Scale bars are 20 μm.



## Figure 6

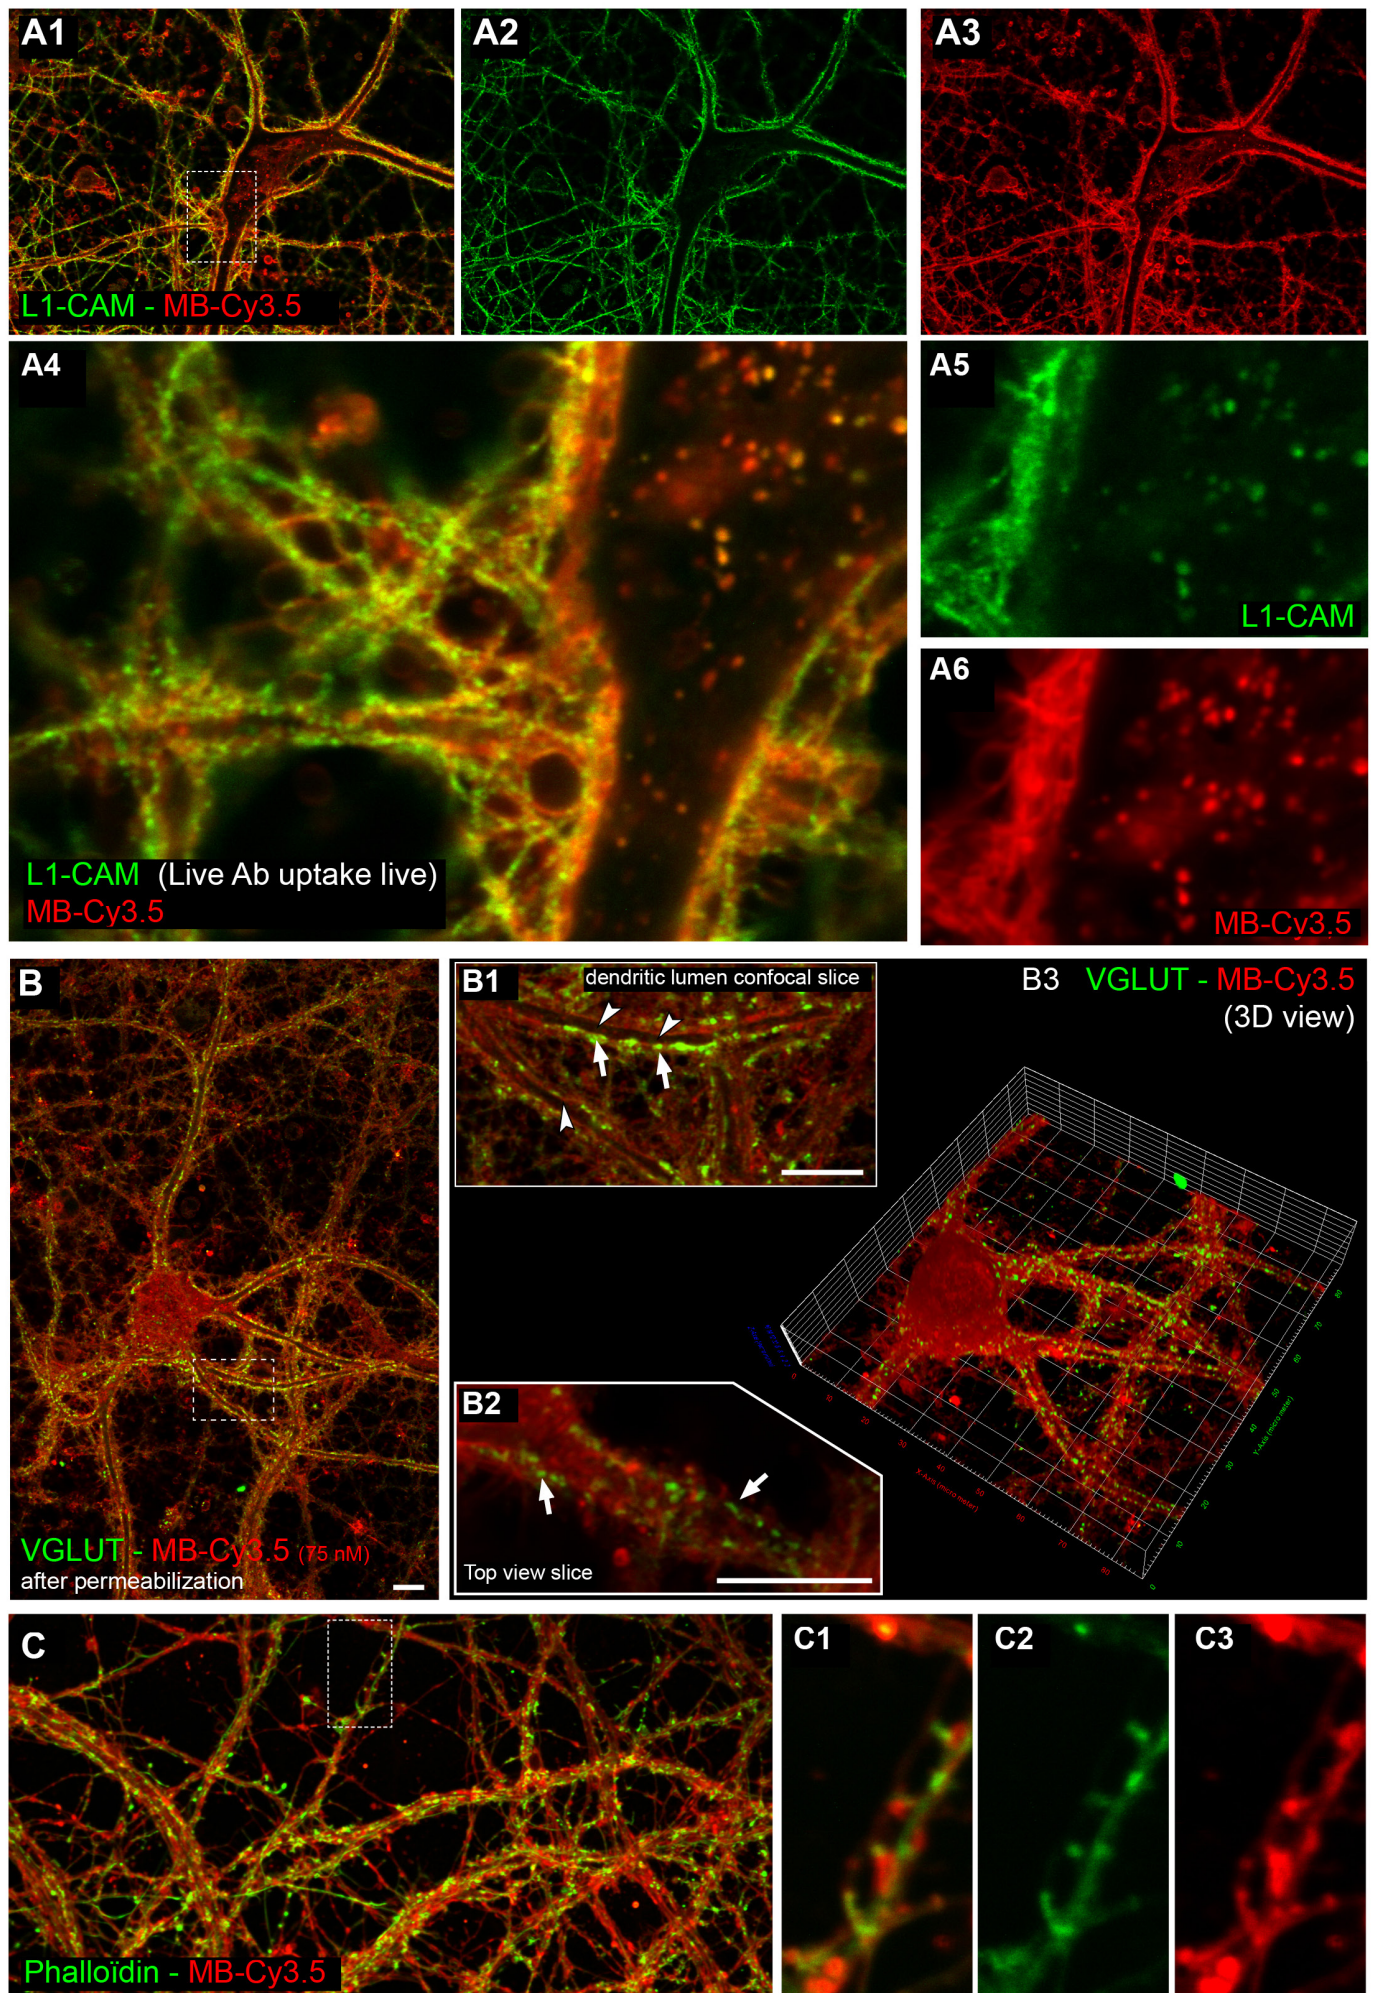

**Figure 6. Multicolor imaging using MemBright and labelled endogenous proteins.** (A) Confocal imaging of primary hippocampal neurons incubated with MB-Cy3.5 (red in A1-A3, A4 and A6) and L1-CAM mAb (Green in A1-A2, A4 and A5) for 10 min at 37°C. MB-Cy3.5 allows the identification of the PM both on the cell body and dendrites as shown with colocalization of the cell surface L1-CAM adhesion molecule in A1. Internalised vesicles can be tracked with L1-CAM antibody (zoom in A5) or with MB-Cy3.5 (A6) for a wider identification of different endocytic pathways. (B) Confocal imaging of primary hippocampal neurons incubated with MB-Cy3.5 (B1-B3) for 10 min at 37°C then fixed, permeabilised and incubated with pAb to VGLUT (Green). MB-Cy3.5 allows the identification of the PM both on confocal section passing either through the dendrite (B1) or below the dendrite (B2) which can be visualized in 3D thanks to stack reconstruction (B3). Presynaptic boutons labelled with VGLUT (arrows) can be seen in contact on the dendritic membrane. Even the dark lumen of dendrite (arrowhead) can be visualized. (C) Confocal imaging of primary hippocampal neurons incubated with MB-Cy3.5 (red) and phalloidin A488 (green) showing that dendritic spine head/neck can be seen with both dyes.



## Figure 7

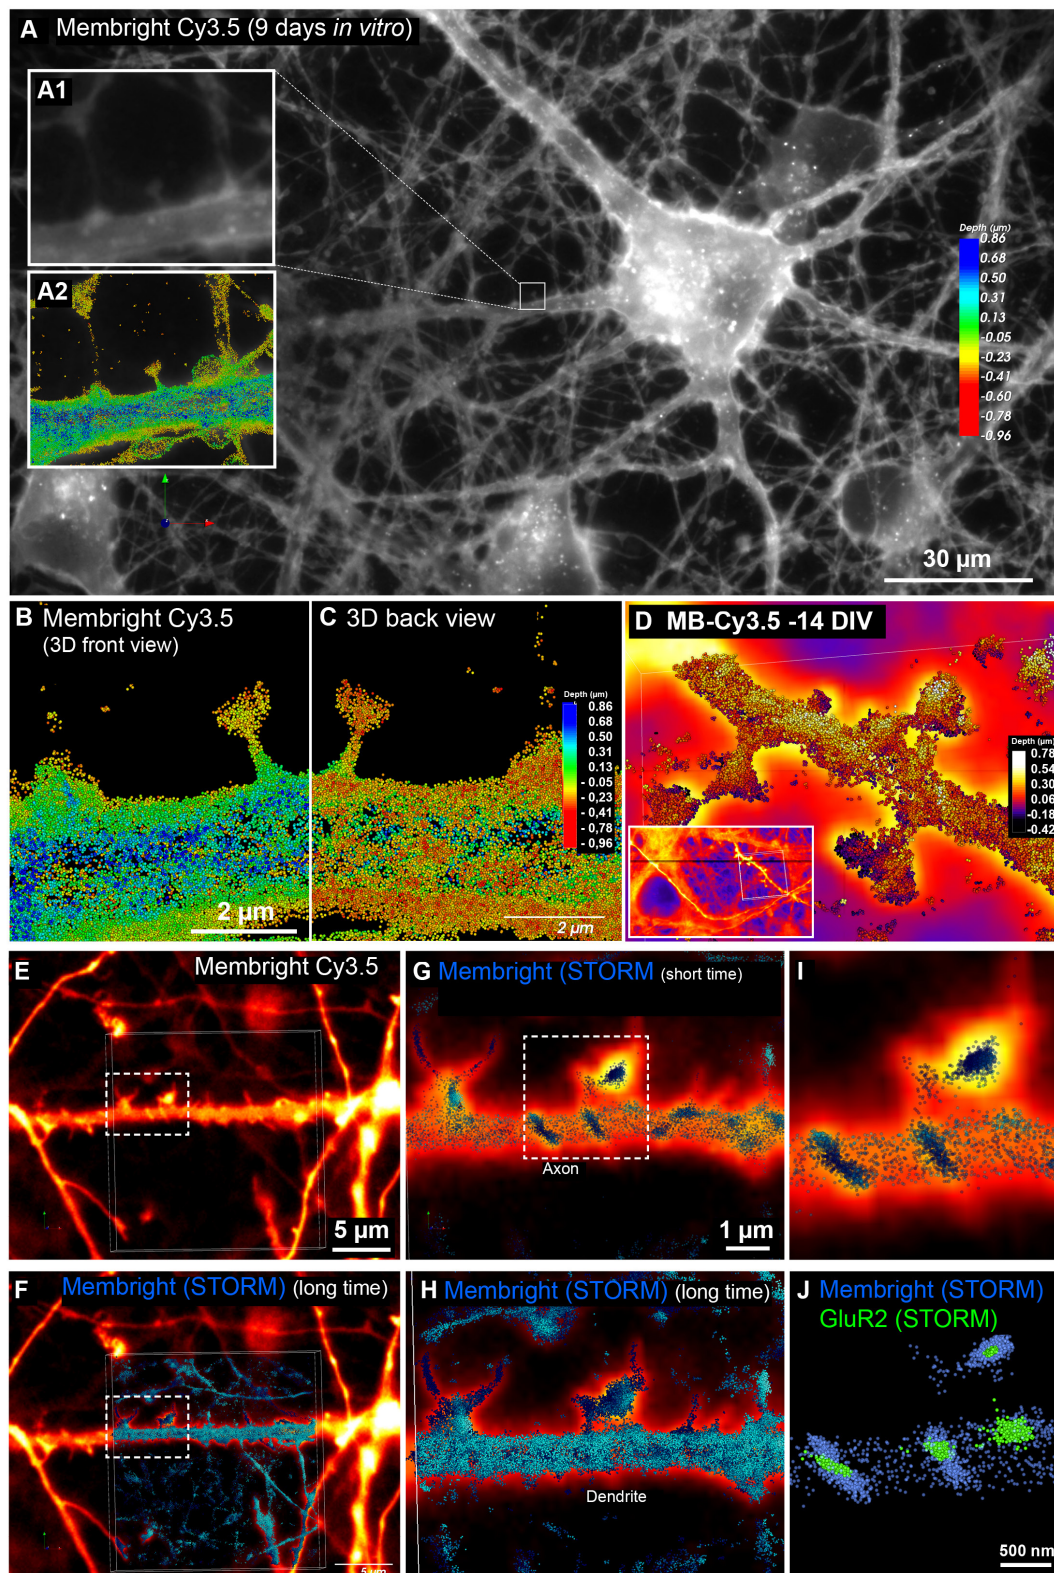

**Figure 7. STORM microscopy of neurons using Membright Cy3.5.** Imaging of hippocampal neurons labelled with MemBright after 9 (A-B-C) or 14 (D) days *in vitro*. Spines can be identified in widefield microscopy (A1) and then super-resolved using STORM (A2-B-C). 3D STORM microscopy allowed visualizing the spine from the front (B) or the back view (C). See supplementary movie 6 for animated views. MemBright Cy3.5 allows the visualization of the PM through several microns thanks to biplane module, depth is color-coded both in B-C-D (rainbow LUT). Dendritic and axonal profiles can be visualized in widefield microscopy (in E). Axonal processes coil around the dendrite (dashed box in E, zoom in G and I) and can be reconstructed in the first 3D-STORM images due to intense blinking. After several hundred pictures, the dendritic shape can be reconstructed in F (zoom in H). Thanks to permeabilization resistance, MemBright (blue) can be used in dual color immunofluorescence to visualize glutamate AMPA receptors clusters (green) aggregated at the dendrite in front of axonal profile (J) with interleaved 3D STORM stack.
